# Supplementary material
Source: PubMed Central journal article supplement (PMC6132252)
Supplement: NIHMS1504076-supplement-Supplement3.pdf [file NIHMS1504076-supplement-Supplement3.pdf]

#EAR Calculator

#Author

#Joe Swintek 3-3-2017#####  
##########  
#####

## Calculation

Functions ##

#####  
##########  
#####

#This file contains all the functions used in calculating EAR values

#This is the back end to the that handles calculations

#####  
#####

#

Global #

#####  
#####

#Global values used in the calculation algorithms

#Warnings.EAR

#List data structure [[1]] contains it's length will each element is a warning to the user

#ChemMasterList.EAR

#Data Set containing assays for all the chemical

#ChemMasterListFlat.EAR

#Data Set containing assays for all the chemical flattened into a matrix of chemical by  
assay

#ChemInfoList.EAR

#A data set containing the Names, CAS numbers, molecular weights, and Formulas of the  
chemicals

#PlottingCat.EAR

#Global Vector that stores the values for the plotting categories

#4 Categories 1: dot, 2: blue, 3:green, 4:red (

#3 numbers indicating the upper bound of each category

#####  
#####

# Function

List #

#####  
#####

#RunEARAll

```
#ConvertChemData
  #FilterChemData
    #Convert2ug
  #Find Detects
#CalculatedAllEAR
  #CalculateEAR3D
    #GetAC50All
    #GetAC50ListAll
    #CalculateEARAll
  #GetMW
  #Convert2uM
```

```
#####
#####
```

```
#                               Function                               #
Information                               #
#####
```

```
#RunEARAll
```

```
  #Main Function call for EAR calculation
  #Command line only, not called from GUI
  #Note '.' notion designates the use of a global
```

```
#Inputs
```

```
  #File
    #File containing chemical survey data, the format has to be specific
```

```
#OutPut
```

```
  #Creates Global Warnings.EAR
  #Contains all the warning messages
  #Contains $N
    #The number of warning messages
  #OutputEARAll
    #List containing:
      #CleanedData
        #Filtered chemistry data with all of the detect limit rules applied
      #ResultsEAR
```

```
#ResultsEAR
```

```
  #List containing:
    #EARCube
      #A rank 3 tensor containing EAR Values for in a Site by Chemical by Assay
    #ChemicalNames
      #A number of chemicals by 2 character vector that contain chemical names [
        ,1] and CAS numbers [ ,2]
    #SiteData
      #A data frame containing:
        #USGS STATION NAME
          #The Full Name of the Station
        #FIELD NAME
          #An abbreviated name of the station
        #DATE COLLECTED
          #The date of collection
```

```

#TIME COLLECTE
    #The time the data is collected
#SAMPLE RECORD NUMBER
    #A number unique to the collected sample
#Units
#MW
    #A character vector that contains the molecular weights of each chemical as
    its entries.
    #The names of the vector are the chemicals themselves
#AC50s
    #A number of assays by number of chemicals matrix
    #The row names are the names of the assays
#UnderLimit
    #A Site by Chemical by Assay tensor containing a 1 if the chemical is under
    the detection limit and 0 otherwise

```

```

#Called By
    #NOTHING
#Calls Directly \ Indirectly
    #ConvertChemData
        #FilterChemData
            #Convert2ug
        #Find Detects
#CalculateEAR
    #CalculateEAR3D
        #CalculateEAR3D
        #GetAC50All
        #GetAC50ListAll
        #CalculateEARAll
    #GetMW
    #Convert2uM

```

```

#####
#####

```

```

#ConvertChemData
    #Converts formatted Chemical data into EAR comparable Data

```

```

#Inputs
    #Data
        #A Read in MED EAR formatted exposure data

```

```

#OutPut
    #AllCleanData
        #List containing:
            #SiteIdData
                #Data set containing site information
            #ChemData
                #Data set containing chemical information (concentrations)
            #UNITS
                #Units of chemical concentrations
            #ChemNames

```

```

#names of chemical
#CasRN
#Cas numbers for each chemical
#UnderLimit
#A matrix containing a 1 if the sit/chemical combination is under the
detection limit

```

```

#Called By
#RunEARAll
#StartGUI.EAR (RunButton.EAR button in GUI)
#Calls Directly \ Indirectly
#FilterChemData
#Convert2ug
#Find Detects

```

```

#####
#####

```

```

#FilterChemData
#Takes a column from the the ChemData data set within the ConvertChemData function and
filters it (see function for details)

```

```

#Inputs
#ChemColmn
#A columns of chemistry data from ConvertChemData

```

```

#OutPut
#c(ChemColmn[1],MeasuredValues)
#Column vector containing name of chemical then filtered and converted exposure
data for each site

```

```

#Called By
#ConvertChemData
#Calls Directly \ Indirectly
#Convert2ug

```

```

#####
#####

```

```

#CalculatedAllEAR
#Calculates EAR on all possible Assay

```

```

#Inputs
#CleanData
#Data cleaned by ConvertChemData
#BOOL
#Bool to use the Cytotoxic values

```

```

#OutPut
#ResultsEAR
#List containing:
#EARCube
#A rank 3 tensor containing EAR Values for in a Site by Chemical by Assay
#ChemicalNames
#A number of chemicals by 2 character vector that contain chemical names [

```

```
    ,1] and CAS numbers [ ,2]
#SiteData
  #A data frame containing:
    #USGS STATION NAME
      #The Full Name of the Station
    #FIELD NAME
      #An abbreviated name of the station
    #DATE COLLECTED
      #The date of collection
    #TIME COLLECTE
      #The time the data is collected
    #SAMPLE RECORD NUMBER
      #A number unique to the collected sample
    #Units
#MW
  #A character vector that contains the molecular weights of each chemical as
  its entries.
  #The names of the vector are the chemicals themselves
#AC50s
  #A number of assays by number of chemicals matrix
  #The row names are the names of the assays
#UnderLimit
  #A Site by Chemical by Assay tensor containing a 1 if the chemical is under
  the detection limit and 0 otherwise
```

```
#Called By
  #RunEARAll
  #StartGUI.EAR (RunButton.EAR button in GUI)
#Calls Directly \ Indirectly
  #CalculateEAR3D
    #GetAC50All
    #GetAC50ListAll
    #CalculateEARAll
  #GetMW
  #Convert2uM
```

```
#####
#####
```

```
#CalculateEAR3D
  #Calculates EAR values and places them in a site by chemical by assay rank 3 tensor
```

```
#Inputs
  #ChemDataMW
    #A character vector that contains the molecular weights of each chemical as its
    entries.
    #The names of the vector are the chemicals themselves
  #NameCas
    #A number of chemicals by 2 character vector that contain chemical names [ ,1] and
    CAS numbers [ ,2]
  #ID
    #A string contain 'CAS' or 'name'
    #Indicates which part of NameCAS is used
```

```
#OutPut
  #EARInformation
    #A list containing two values
      #EARCube
        #A rank 3 tensor containing EAR Values for in a Site by Chemical by Assay
      #AC50Mat
        #A number of assays by number of chemicals matrix
        #The row names are the names of the assays
```

```
#Called By
  #CalculateEAR3D
```

```
#Calls Directly \ Indirectly
  #GetAC50All
  #GetAC50ListAll
  #CalculateEARAll
```

```
#####
#####
```

```
#GetAC50All
  #gets the AC 50s for all assays for all chemicals in the data set
```

```
#Inputs
  #Name
    #A value with chemical name and CAS name
  #NAssay
    #The total number of Assays
  #ChemMasterListFlat.EAR
    #Global, Contains all the Assays for every chemical
```

```
#OutPut
  #AC50s
    #Vector of AC50 (NA is capacitive or missing) for every possible assay pertaining
    to the chemical in Name
```

```
#Called By
  #CalculateEAR3D
```

```
#Calls Directly \ Indirectly
  #NOTHING
```

```
#####
#####
```

```
#GetAC50ListAll
  #Arranges the AC 50 to be a NSite by NChem matrix as a list
```

```
#Inputs
  #Assay
    #The assay being used
  #AC50Mat
    #output from GetAC50All
    #Matrix of AC50 (NA is capacitive or missing) for every possible assay
    pertaining to the chemical in Name
  #AssayList
```

```
#A vector containing all possible assays
#SiteN
#Number of Sites

#OutPut
#AC50Mat
##A number of assays by number of chemicals matrix
#The row names are the names of the assays

#Called By
#CalculateEAR3D

#Calls Directly \ Indirectly
#NOTHING

#####
#####
#CalculateEARAll
#Calculates EAR for all Assays

#Inputs
#AC50Mat
#Site by Chemical matrix of AC50's for 1 assay
#ChemDataMW
#Chemistry data converted to uMol

#OutPut
#Site by Chemical matrix of EARValues for 1 assay

#Called By
#CalculateEAR3D

#Calls Directly \ Indirectly
#NOTHING

#####
#####
#FindDetects
#Identifies the values in the data set that under the detection limit
#Meant to be called using the apply function

#Inputs
#ChemColumn
#A column corresponding the the chemical entries for all sites from the original
data file

#OutPut
#A vector of 1's and 0's
#1 corresponds to an observation under the detection limit
#0 corresponds to an observed value

#Called By
#ConvertChemData
```

```
#Calls Directly \ Indirectly
#NOTHING
```

```
#####
#####
```

```
#GetMW
```

```
#gets the molecular weight of each chemical
```

```
#Inputs
```

```
#Chemical
```

```
#The name or CAS number of a chemical
```

```
#ID
```

```
#Tells the function whether chemical is a Name or CAS
```

```
#Uses Global ChemInfoList.EAR
```

```
#OutPut
```

```
#Chem1Info$Mol
```

```
#The molecular weight of a chemical
```

```
#Called By
```

```
#CalculateEAR
```

```
#Calls Directly \ Indirectly
```

```
#NOTHING
```

```
#####
#####
```

```
#Convert2uM
```

```
#converts numbers in Vec units to uM
```

```
#Inputs
```

```
#Vec
```

```
#Vector of concentrations to convert to uM, assumes Vec[1] is the MW
```

```
#Units
```

```
#Units concentrations are in can be 'ug/L', 'ng/L' or 'MW'
```

```
#OutPut
```

```
#c(MW, Out)
```

```
#Vector [1] is the MW the rest are uM of the chemicals
```

```
#Called By
```

```
#CalculateEAR
```

```
#Calls Directly \ Indirectly
```

```
#NOTHING
```

```
#####
#####
```

```
#AboveThreshold (1-6-2016)
```

```
#Inputs #Threshold
```

```
#Value to compare results against
```

```
#ResultsEAR
```



```
#Results from CalculatedAllEAR
```

```
#OutPut
```

```
#OutData
```

```
#Data containing site, chemical, and assay information for EARs above the threshold
```

```
#Called By
```

```
#PlotViewerGUI.EAR [ExportTheshButton]
```

```
#Calls Directly \ Indirectly
```

```
#NOTHING
```

```
#####
#####
```

```
#
```

```
Functions
```

```
#
```

```
#####
#####
```

```
RunEARAll<-function(File) {
```

```
#Main Function call for EAR calculation
```

```
#File is the name of the file with the survey data
```

```
# '.' notion designates the use of a global
```

```
#Start Box of warning Messages
```

```
Warnings.EAR<<-list()
```

```
Warnings.EAR$N<<-1
```

```
#Read File
```

```
Data<-read.csv(File,stringsAsFactors=FALSE,header=FALSE)
```

```
#Clean the Data
```

```
CleanedData<-ConvertChemData(Data)
```

```
#Calculate EAR
```

```
ResultsEARAll<-CalculatedAllEAR(CleanedData,FALSE)
```

```
return(ResultsEARAll)
```

```
}
```

```
#####
#####
```

```
ConvertChemData<-function(Data) {
```

```
#Converts formatted Chemical data into EAR comparable Data
```

```
#Data is a comparable formate R Data structure which assumes:
```

```
#First row contains a chemical name
```

```
#Second row contains a CAS number with ? or - between numbers
```

```
#Third row contain concentrations units or are header observation identifiers
```

```
#Columns that have observation identifier in the third row are identified by '' (an empty string) in the first rows
```

```
#'Sample record number' is the unique identifier for a site
```

```
#Removes all rows without a record number
```

```

#Attain identifiers
  IdColmn=which(Data[,]==')
#Compensate for capitalization differences
  Data[,IdColmn]<-toupper(Data[,IdColmn])
#Filter out non-sites
  IdUnique<-which(Data[,IdColmn]=='SAMPLE RECORD NUMBER')
  NotASite<-which(Data[,IdUnique]==')
  NotASite<-NotASite[-which(NotASite<=2)]
  if (length(NotASite)>0){
    Data<-Data[-NotASite, ]
  }
#Attain a separate data sets of site Ids and chem information
  SiteIdData<-Data[,IdColmn]
  ChemData<-Data[,-IdColmn]
#Clean up site ID data
  SiteIdDataHeader<-SiteIdData[, ]
  SiteIdData<-SiteIdData[-{1:3}, ]
  colnames(SiteIdData)<-SiteIdDataHeader
#Fix the string containing CAS numbers
  CAS<-gsub('[?]', '-', ChemData[, ])
#Filter the ChemData
  options(warn=-1) #Turns off warns as there will be some
  UnderLimit<-apply(ChemData[,2], FindDetects)
  UnderLimit<-matrix(apply(UnderLimit[,2:dim(UnderLimit)[1]], [,2], as.numeric), ncol=dim(
  UnderLimit)[2])
  ChemDataUpdate<-apply(ChemData[,2], FilterChemData)

  options(warn=0)
  ChemNames<-ChemDataUpdate[, ]
#Merge and Clean up data set
  ChemDataFrame<-as.data.frame(apply(ChemDataUpdate[-1, ],2, as.numeric))
  colnames(ChemDataFrame)<-ChemNames
#Add units and complete the data set
  UNITS<-'ug/L'
  SiteIdData<-cbind(SiteIdData, UNITS)
  SiteIdData$UNITS<-as.character(SiteIdData$UNITS)
  FilteredData<-cbind(SiteIdData, ChemDataFrame)
#Get data structure
  AllCleanData<-list('SiteData'=SiteIdData, 'ChemData'=ChemDataFrame, 'UNITS'=UNITS, 'ChemNames'=
  ChemNames, 'CasRN'= CAS, 'UnderLimit'=UnderLimit)
return(AllCleanData)
}

#####
#####
CalculatedAllEAR<-function(CleanedData, BOOL) {
#Calculates EAR on all possible Assay

#Apply the Bool
  if (BOOL==TRUE){
    ChemMasterListFlat.EAR<-ChemMasterListFlatCytotox.EAR #3-21-2016
  }
}

```

## #Step 1 Extract Information from the Data Structure

```
NameCas<-cbind(CleanedData$ChemNames,CleanedData$CasRN)
ChemData<-CleanedData$ChemData
Units<-CleanedData$UNITS
```

## #Step 2 get MW

```
MW<-apply(NameCas,1,GetMW,'CAS')
ChemDataMW<-rbind(MW,ChemData)
```

## #Step 3 Covert to uM

```
ChemDataMW<-apply(ChemDataMW,2,Convert2uM,Units)
```

## #Step 4 Covert to EAR

```
EARInformation<-CalculateEAR3D(ChemDataMW,NameCas,'CAS',BOOL)
```

```
ResultsEAR<-list('EARCube'=EARInformation$EARCube,'ChemicalNames'=NameCas,'SiteData'=
CleanedData$SiteData,
                'MW'=ChemDataMW[1, ],'AC50s'=EARInformation$AC50s,'UnderLimit'=CleanedData$
UnderLimit)
```

```
return(ResultsEAR)
```

```
}
```

```
#####
#####
```

```
CalculateEAR3D<-function(ChemDataMW,NameCas, ID,BOOL) {
```

```
#Calculate EAR on all Assays and for a Data Set
```

```
#ChemDataMW is pre-calculated data as MW
```

```
#Name CAS is link with chemical names and CAS in the same order of column Names of ChemDataMW
```

```
#ID is what is used as an identifier
```

```
#Apply Crytox
```

```
if (BOOL==TRUE) {
```

```
  ChemMasterListFlat.EAR<-ChemMasterListFlatCytotox.EAR #3-21-2016
```

```
}
```

```
#Get Matrix of AC 50 for all used chemicals for all Assays
```

```
NAssay<-dim(ChemMasterListFlat.EAR) [1]
```

```
if (ID=='name') {
```

```
  Names<-NameCas [ ,1]
```

```
}
```

```
if (ID=='CAS') {
```

```
  Names<-NameCas [ ,2]
```

```
}
```

```
AssayList<-rownames(ChemMasterListFlat.EAR)
```

```
NSite<-dim(ChemDataMW) [1]-1
```

```
AC50Mat<-sapply(Names,GetAC50All,NAssay,BOOL)
```

```
AC50List<-lapply(AssayList,GetAC50ListAll,AC50Mat,AssayList,NSite)
```

```
#Convert to a list for NSite,NChemical with NAssay elements
```

```
EARList<-lapply(AC50List,CalculateEARAll,ChemDataMW)
```

```

#Convert to a cube of data
EARCube<-array(unlist(EARList), dim = c(nrow(EARList[[1]]), ncol(EARList[[1]]), length(
EARList)))
EARInformation<-list('EARCube'=EARCube, 'AC50s'=AC50Mat)
return(EARInformation)
}

#####
#####
GetMW<-function(Chemical, ID) {
#Gets the MW of a Chemical
#Uses Global ChemInfoList.EAR
NameOut<-paste(Chemical[1], Chemical[2])

if (ID=='Name'){#Name may be subject to white space thus not recommended
  Chem1Info<-ChemInfoList.EAR[which(ChemInfoList.EAR$Name==Chemical[1]), ]
}
if (ID=='CAS'){
  Chem1Info<-ChemInfoList.EAR[which(ChemInfoList.EAR$CAS==Chemical[2]), ]
}
}

#Check for of Chemical
if (min(dim(Chem1Info))==0) {
  message(paste('Warning! Information for ', NameOut, ' is not in the database', sep=''))
  Warnings.EAR[[Warnings.EAR$N+1]]<-paste('Warning! Information for ', NameOut, ' is not
in the database', sep='')
  Warnings.EAR$N<-Warnings.EAR$N+1

  return(NA)
}

#Check for Molecule weight for the chemical
if (length(Chem1Info$Mol)==0) {
  message(paste('Warning! Molecule weight for ', NameOut, ' is not in the database', sep=''))
  Warnings.EAR[[Warnings.EAR$N+1]]<-paste('Warning! Molecule weight for ', NameOut, ' is
not in the database', sep='')
  Warnings.EAR$N<-Warnings.EAR$N+1
  return(NA)
}

}

#Warning Messages
return(Chem1Info$Mol)
}

#####
#####
FindDetects<-function(ChemColmn) {
#Takes a column from the the ChemData data set within and find the values of non-detect
#Entries that contain < anywhere within them are below the detection limit
#1 means it's under the detection limit 0 means it's not

#Find values below detection limit
SiteValues<-ChemColmn[-{1:3}]
NonDetecs=which(SiteValues != gsub('<', '', SiteValues))

```

```

SiteValues[1:length(SiteValues)]<-0
SiteValues[NonDetecs]<-1
return(c(ChemColumn[1],SiteValues))
}

#####
#####
GetAC50All<-function(Name,NAssay,BOOL){
#gets the AC 50s for all assays for all chemicals in the data set
#Uses Global ChemMasterListFlat.EAR
#NameCasIn is a value with chemical name and CAS name
#NAssay is the total number of Assays

#Apply Crytox
if (BOOL==TRUE){
  ChemMasterListFlat.EAR<-ChemMasterListFlatCytotox.EAR #3-21-2016
}

#Return NA if no name is supplied
if (Name == ''){
  return(rep(NA,NAssay))
}
ColNumber<-which(colnames(ChemMasterListFlat.EAR)==Name)
#Return NA if chemical is not in Assay list
#6-20-2016 change
if (length(ColNumber)==0){
  AC50s<-ChemMasterListFlat.EAR[ ,1]
  AC50s[1:length(AC50s)]<-NA
  return(AC50s)
}
AC50s<-ChemMasterListFlat.EAR[ ,ColNumber]
#Return NA if chemical is not Active
Inactive<-which(AC50s==1000)
if (length(Inactive)>0){
  AC50s[Inactive]<-NA
}
return(AC50s)
}

#####
#####
GetAC50ListAll<-function(Assay,AC50Mat,AssayList,SiteN){
#Arranges the AC 50 to be a NSite by NChem matrix as a list
#Assay is the assay being used
#AC50Mat is output from GetAC50All
#AssayList List of every possible assay
#SiteN is the number of Sites
AssayNum<-which(AssayList==Assay)
AC50<-AC50Mat[AssayNum, ]
AC50Rep<-rep(AC50,SiteN)
AC50Mat<-matrix(AC50Rep,nrow=SiteN,byrow = TRUE)
return(AC50Mat)
}

```

}

```
#####
#####
```

```
Convert2uM<-function(Vec,units){
#converts numbers in Vec units to uM
#Only works if called from CalculateEAR
  MW<-Vec[1] #Assumes the first element of the vector is the MW
  Vec<-Vec[-1]
  CorrectUnits<-FALSE
  if (units=='ug/L'){
    Out<-Vec/MW #changed 9/2/2015
    CorrectUnits<-TRUE
  }
  if (units=='ng/L'){
    Out<-Vec*1000
    CorrectUnits<-TRUE
  }
  if (units=='MW'){ #Double Check this
    Out<-Vec
    CorrectUnits<-TRUE
  }

  if (CorrectUnits==FALSE){
    message('Warning units are not known by the conversion function')
    message('Conversion function can only handle ug/L and ng/L')
  }
return(c(MW,Out))
}
```

```
#####
#####
```

```
Convert2ug<-function(Vec,units){
#converts numbers in Vec units to ug/L
#only handles ng/L as of right now
  if (units=='ug/L'){
    return(Vec*1)
  }
  if (units=='ng/L'){
    return(Vec*0.001)
  }

  message('Warning units are not known by the conversion function')
  message('Conversion function can only handle ug/L and ng/L')
return(Vec)
}
```

```
#####
#####
```

```
FilterChemData<-function(ChemColumn){
#Takes a column from the the ChemData data set within the ConvertChemData function and filters
it based on
  #If there is a value reported replace the value reported with 1/4 the lowest value reported
```

```
#If there is not a value reported replace the value reported with 1/10 the detection limit
#Entries that contain < anywhere within them are below the detection limit
#Uses All other symbols as untested chemicals
```

```
#Removes all alpha characters
```

```
SiteValues<-ChemColmn[-{1:3}]
SiteValues<-gsub('[A-Z,a-z]', '', SiteValues)
SiteValues<-gsub(' ', '', SiteValues)
```

```
#Check for reported Values
```

```
MeasuredValues<-as.numeric(SiteValues)
ValueReported<-sum(!is.na(MeasuredValues)>0) #bool
```

```
#Find values below detection limit
```

```
NonDetecs=which(SiteValues != gsub('<', '', SiteValues))
```

```
#End Function if there is no Non-Detects
```

```
if (length(NonDetecs)==0){
  MeasuredValues<-Convert2ug(MeasuredValues, ChemColmn[3]) #Convert to ug/L
  return(c(ChemColmn[1], MeasuredValues))
}
```

```
#Detection limit rules
```

```
if (ValueReported){ #Found a measured value for that chemical
  MinValue<-min(MeasuredValues, na.rm=TRUE)/4;
}
if (!ValueReported){ #Did not find measured value for that chemical 1/10 detection limit
  MinValue<-as.numeric(gsub('<', '', SiteValues))[NonDetecs]/10;
}
```

```
#Apply Detection limit rules
```

```
MeasuredValues[NonDetecs]<-MinValue
```

```
#Convert to ug/L
```

```
MeasuredValues<-Convert2ug(MeasuredValues, ChemColmn[3])
```

```
return(c(ChemColmn[1], MeasuredValues))
```

```
}
```

```
#####
#####
```

```
CalculateEARAll<-function(AC50Mat, ChemDataMW) {
```

```
#Calculates EAR for all Assays
```

```
#AC50Mat is a matrix of AC50's for 1 assay
```

```
#ChemDataMW is the chemistry data converted to uMol
```

```
return(ChemDataMW[-1, ]/AC50Mat)
```

```
}
```

```
#####
#####
```

```
AboveThreshold<-function(Threshold, ResultsEAR) {
```

```
#Finds all site-chemical-assay combination above the Threshold
```

```
#Threshold
```

```
#Value to compare results against
```

```
#ResultsEAR
```

```
#Results from CalculatedAllEAR
```

```
#Find the values above the Threshold
```

```

if (is.na(Threshold) == TRUE) {
  Threshold<-0
}
UpThresh<-which(ResultsEAR$EARCube >=Threshold)
if (length(UpThresh)<2) {
  message('Error not enough values to be exported')
  return(NULL)
}

```

```
Values<-ResultsEAR$EARCube [UpThresh]
```

```

#Find the sites, chemical, and assay associated with that value
Size<-dim(ResultsEAR$EARCube)

```

```

#Assay
AssayLoc<-ceiling(UpThresh/(Size[1]*Size[2]))

```

```

#Prep for site and chemical
BlockN <- (UpThresh) %% (Size[1]*Size[2])
if (length(which(BlockN==0))>0) {
  BlockN[which(BlockN==0)]<-Size[1]*Size[2]
}

```

```

#Site
ChemicalLoc<-ceiling(BlockN/(Size[1]))

```

```

#Chemical
SiteLoc<-BlockN %% (Size[1])
if (length(which(SiteLoc==0))>0) {
  SiteLoc[which(SiteLoc==0)]<-Size[1]
}
OutSite<-ResultsEAR$SiteData[SiteLoc, ]
OutChemical<-ResultsEAR$ChemicalNames[ChemicalLoc, ]
OutAssay<-rownames(ResultsEAR$AC50s) [AssayLoc]

```

```

#prep data set
OutData<-cbind(OutSite,OutChemical,OutAssay)
OutData<-cbind(OutData,Values)
colnames(OutData) [c(7,8,9,10)]<-c('Chemical', 'CASN', 'Assay', 'EAR')
OutData<-OutData[ , -6]

```

```

return(OutData)
}

```

```

#####
#####
#####
##                               Information Loading
Functions                          ##
#####
#####
#####
#####

```

#This file contains all the functions used in loading information files in the EAR Calculator



#This is the back end to the that handles calculations

#####  
#####

# Change

Log #

#####  
#####

#####0.75#####  
#####

#Added the global PlottingCat.EAR

#This vector contains the plotting categories

#linked all references to the plotting categories to this vector

#####  
#####

# Global #

#####  
#####

#Global values used in the calculation algorithms

#ChemMasterList.EAR

#Data Set containing assays for all the chemical

#ChemMasterListFlat.EAR

#Data Set containing assays for all the chemical flattened into a matrix of chemical by assay

#ChemInfoList.EAR

#A data set containing the Names, CAS numbers, molecular weights, and Formulas of the chemicals

#####  
#####

# Function

List #

#####  
#####

#Melt.EAR

#GetColumn.Melt.EAR

#GetRow.GetColumn.Melt.EAR

#####  
#####

# Function

Information #

#####

```
#####
#Melt.EAR
#Melt function that converts tall data to wide data

#Inputs
#Data
#The data frame to be melted
#VarC
#the name of the variable that will become the new column variable
#VarR
#the name of the variable that will become the new row variable
#VarValue
#The name of the variable that will become the new value in each cell

#Outputs
#FlatData
#The data set flatten out

#Called By
#NOTHING
#Calls Directly \ Indirectly
#GetColumn.Melt.EAR
#GetRow.GetColumn.Melt.EAR

#####
#####
#GetColumn.Melt.EAR
#gathers information of the new columns

#Inputs
#ColumnValue
#Value of the variable in the new column the is being attained
#VarC
#the name of the variable that will become the new column variable
#RowValues
#Value of the variable in the new row the is being attained
#VarR
#the name of the variable that will become the new row variable
#VarValue
#The name of the variable that will become the new value in each cell
#Data
#The data frame to be melted

#Outputs
#ColData
#A column of flat data

#Called By
#Melt.EAR
#Calls Directly \ Indirectly
#GetRow.GetColumn.Melt.EAR

#####
```

```
#####  
#GetRow.GetColumn.Melt.EAR  
#Gathers VarValue from VarR  
  
#Inputs  
#RowValues  
#Value of the variable in the new row the is being attained  
#VarR  
#the name of the variable that will become the new row variable  
#VarValue  
#The name of the variable that will become the new value in each cell  
#DataSub  
#The subset of the data frame to be melted  
  
#Outputs  
#Value  
#Value of the VarValue corresponding to the row and columns being searched on  
  
#Called By  
#NOTHING  
#Calls Directly \ Indirectly  
#GetColumn.Melt.EAR  
  
#####  
#####  
#DefaultAssayGroups  
#Function sets up default groups for assays  
  
#Inputs  
#NOTHING  
#Global ChemMasterList.EAR  
#Global AssayGroup.EAR  
  
#Outputs  
#Modifies Global AssayGroup.EAR  
  
#Called By  
#UpdateEARCalculator  
#Calls Directly \ Indirectly  
#NOTHING  
  
#####  
#####  
#LoadAssayInformation  
#used load and sanitize an Assay file to be merged into  
  
#Inputs  
#File  
#Name of file to be uploaded  
#Outputs  
#OutData  
#Sanitized Assay information  
  
#Called By
```

```
#UpdateAssayGUI.EAR
```

```
#Calls Directly \ Indirectly
```

```
#ApplySelection
```

```
#####  
####
```

```
#MergeAssayInformation
```

```
#Merges a new data file with ChemMasterList.EAR
```

```
#Inputs
```

```
#Data
```

```
#Sanitized assay data to be merged
```

```
#Uses global ChemMasterList.EAR
```

```
#Outputs
```

```
#ChemMasterList
```

```
#Non-global version of ChemMasterList.EAR
```

```
#Called By
```

```
#UpdateAssayGUI.EAR
```

```
#Calls Directly \ Indirectly
```

```
#ApplySelection
```

```
#####  
####
```

```
#ApplyCytotox
```

```
#Apply Cytotoxic information to the AC50s
```

```
#Inputs
```

```
#Data
```

```
#the new cytotoxic data set
```

```
#Outputs
```

```
#NOTHING
```

```
#Modifies global variables of:
```

```
#Cytotox.EAR
```

```
#ChemMasterListFlatCytotox.EAR
```

```
#Called By
```

```
#UpdateEARCalculator
```

```
#Calls Directly \ Indirectly
```

```
#NOTHING
```

```
#####  
####
```

```
#ApplySelection
```

```
#used to apply the selection criteria across multiple assays
```

```
#Inputs
```

```
#UID
```

```

#The unique assay-chemical combination being filtered
#Data
#Data set containing all assay-chemical combinations

#Outputs
#SubData[UseRow, ]
#the selected row

#Called By
#LoadAssayInformation
#MergeAssayInformation
#Calls Directly \ Indirectly
#NOTHING

```

```
#####
```

```
#####
```

```

#FilterDataFlags
#Filters out specific flag_ids

#Inputs
#Data
#MasterChemList formatted data
#Remove
#numeric vector of flags to remove

```

```

#Outputs
#Data
#Assay data with

#Called By
#
#Calls Directly \ Indirectly
#NOTHING

```

```
#####
```

```
#####
```

```
#
```

```
Functions #
```

```
#####
```

```
#####
```

```

Melt.EAR<-function(Data,VarC,VarR,VarValue) {
#Melt function that converts tall data to wide data
#Data is original data
#VarC is the new column value
#VarR is the new row value
#VarValue is the value of the new cells
ColumnValues<-unique(Data[[VarC]])
RowValues<-unique(Data[[VarR]])
FlatData<-sapply(ColumnValues,GetColumn.Melt.EAR,VarC,RowValues,VarR,VarValue,Data)
FlatData<-t(FlatData)

```

```

}
#####
#####

GetColumn.Melt.EAR<-function(ColumnValue,VarC,RowValues,VarR,VarValue,Data) {
#gathers information of the new columns
#Only called by Melt.EAR
  DataSub<-Data[which(Data[[VarC]]==ColumnValue), ]
  ColData<-sapply(RowValues,GetRow.GetColumn.Melt.EAR,VarR,VarValue,DataSub)
  print(ColumnValue)
return(ColData)
}
#####
#####

GetRow.GetColumn.Melt.EAR<-function(RowValue,VarR,VarValue,DataSub) {
#Gathers VarValue from VarR
#Only called by GetColumn.Melt.EAR
  Value<-DataSub[which(DataSub[[VarR]]==RowValue),VarValue]
  if (length(Value)==0) {
    return(NA)
  }
  if (length(Value)>1) {
    Test1<-DataSub
    Test2<-RowValue
    Test3<-VarValue
  }

return(Value)
}
#####
#####

DefaultAssayGroups<-function() {
#Function sets up default groups for assays
#Ran when assays are updated
#Uses global ChemMasterList.EAR
#Modifies global AssayGroup.EAR

#Find where the default groups are
  #AssayGroup.EAR<-NULL #needed on first run

  AllAssays<-unique(ChemMasterList.EAR$Assay.Endpoint)
  Assaykey<-sapply(strsplit(AllAssays, '_'), function(X) {return (X[1])} )
  AssayGroup.EAR$defaultgroups<-unique(Assaykey)
  #AssayGroup.EAR$Groups<- AssayGroup.EAR$defaultgroups #needed on first run

#Replace into the default groups

```

```

for (e in AssayGroup.EAR$defaultgroups) {
  AssayGroup.EAR[[e]]<-AllAssays[Assaykey==e]
}

#Alter Global AssayGroup.EAR
AssayGroup.EAR<<-AssayGroup.EAR
return(NULL)
}

#####
#####
ApplySelection<-function(UID,Data) {
#This function selects one value for the AC50 of an assay-chemical combination
#Data is the data set to be collapsed
#UID is the unique assay chemical combination

SubLoc<-which(Data[['UID']]==UID)
SubData<-Data[SubLoc, ]
print(UID)
#Use the most conservative
UseRow<-which(SubData[['AC.50']]==min(SubData[['AC.50']]))[1]

return(SubData[UseRow, ])
}

#####
#####
LoadAssayInformation<-function(File) {
#used load and sanitize an Assay file to be merged into
#File is the name of the file to be imported
#Added id flags 8-1-2016

#Read Data
Data<-read.csv(File,stringsAsFactors=FALSE,header=TRUE)
#Apply gsid as the representative sample
Data<-Data[Data$gsid_rep==1, ]
#filter out information
Data1<-Data[ ,c('casn', 'chnm', 'chid', 'aenm', 'logc_min', 'modl_ga', 'modl_la', 'hitc', 'flag_ids'
)] #Added
#Gather AC50s
#AC50 is the model gain AC 50
#unless a gain DNE then it's the loss
#If hitc == 0 it's na
AC50<-10^Data1$modl_ga

IDga<-which(is.na(Data1[ , 'modl_ga']))==TRUE)
if (length(IDga)>0) {
  AC50[IDga]<-10^Data1[IDga, 'modl_ga']
}
IDhit<-which(Data1[ , 'hitc']==0)
if (length(IDhit)>0) {
  AC50[IDhit]<-NA
}

```

```

}

R1000<-which(is.na(AC50)==TRUE)
if(length(R1000)>0){
  AC50[R1000]<-1000
}

#Store AC 50 and minimum tested values
Data1$AC.50<-AC50
Data1$MinTest<-10^Data1$logc_min

#Test to see if AC is less then the smallest tested amount
Data1$UnderTest<-{AC50<{10^Data1$logc_min}}
Data2<-Data1[ ,c('casn', 'chnm', 'chid', 'aenm', 'AC.50', 'MinTest', 'UnderTest', 'flag_ids')]

#Convert columns names back to old format
colnames(Data2)<-c('CASRN', 'Chemical.Name', 'chid', 'Assay.Endpoint', 'AC.50',
'MinTestedConcentration', 'UnderTest', 'flag_ids')
Data2[['Assay.Endpoint']]<-gsub(' ','_',Data2[['Assay.Endpoint']])
Data2[['Chemical.Name']]<-gsub(' ','_',Data2[['Chemical.Name']])

#Remove tests that do not have identification of the chemicals used
Remove<-which(is.na(Data2[['Chemical.Name']])==TRUE)
if(length(Remove)>0){
  Data2<-Data2[-Remove, ]
}

return(Data2)
}

#####
#####
LoadAssayInformation2<-function(File){
#used load and sanitize an Assay file to be merged into
#File is the name of the file to be imported
#Added id flags 8-1-2016
#Added modl_cc 11-17-2016

#Read Data
Data<-read.csv(File,stringsAsFactors=FALSE,header=TRUE)
#Apply gsid as the representative sample
Data<-Data[Data$gsid_rep==1, ]
#filter out information
Data1<-Data[ ,c('casn', 'chnm', 'chid', 'aenm', 'logc_min', 'modl_ga', 'modl_la', 'hitc', 'flag_ids',
' modl_acc')] #Added
#Gather AC50s
#AC50 is the model gain AC 50
#Unless a gain DNE then it's the loss
#If hitc == 0 it's na
#AC50<-10^Data1$modl_ga
AC50<-10^Data1$modl_acc
IDga<-which(is.na(Data1[ , 'modl_acc']')==TRUE)
if (length(IDga)>0){
  AC50[IDga]<-10^Data1[IDga, 'modl_acc']
}

```



```

}
IDhit<-which(Data1[ , 'hitc']==0)
if (length(IDhit)>0){
  AC50[IDhit]<-NA
}

R1000<-which(is.na(AC50)==TRUE)
if(length(R1000)>0){
  AC50[R1000]<-1000
}

#Store AC 50 and minimum tested values
Data1$AC.50<-AC50
Data1$MinTest<-10^Data1$logc_min

#Test to see if AC is less then the smallest tested amount
Data1$UnderTest<-{AC50<{10^Data1$logc_min}}
Data2<-Data1[ ,c('casn', 'chnm', 'chid', 'aenm', 'AC.50', 'MinTest', 'UnderTest', 'flag_ids')]
#Convert columns names back to old format
colnames(Data2)<-c('CASRN', 'Chemical.Name', 'chid', 'Assay.Endpoint', 'AC.50',
'MinTestedConcentration', 'UnderTest', 'flag_ids')
Data2[['Assay.Endpoint']]<-gsub(' ','_',Data2[['Assay.Endpoint']])
Data2[['Chemical.Name']]<-gsub(' ','_',Data2[['Chemical.Name']])

#Remove tests that do not have identification of the chemicals used
Remove<-which(is.na(Data2[['Chemical.Name']])==TRUE)
if(length(Remove)>0){
  Data2<-Data2[-Remove, ]
}

return(Data2)
}

#####
#####
MergeAssayInformation<-function(Data){
#Merges a new data file with ChemMasterList.EAR
#It will merge new information in, but it actually replaces the old information
#with new information in the case of a conflict
#Data, sanitized assay data to be merged
#Uses global ChemMasterList.EAR

#Use a temporary master list
ChemMasterList<-ChemMasterList.EAR
#Find the conflicts
ChemMasterListUID<-paste(ChemMasterList[['Assay.Endpoint']],ChemMasterList[['CASRN']])
DataUID<-paste(Data[['Assay.Endpoint']],Data[['CASRN']])
Conflics<-which(is.element(ChemMasterListUID,DataUID))

#Remove conflicts
if (length(Conflics)>0){
  ChemMasterList<-ChemMasterList[-Conflics, ]
}

```

```

#Merge
  ChemMasterList<-rbind(ChemMasterList,Data)

return(ChemMasterList)
}

#####
#####
ApplyCyttox<-function(Data) {
  CyttoxInfo.EAR<-Data
  Limit<-CyttoxInfo.EAR$lower_bnd_um
  CAS<-sapply(CyttoxInfo.EAR$chid, function(X) { ChemInfoList.EAR$CASNum[ChemInfoList.EAR$chid==
X]})
  Chemicals<-colnames(ChemMasterListFlat.EAR)

#Apply the Cytotoxic information
  ChemMasterListFlatCytotox.EAR<-sapply(Chemicals, function(X, Limit, CAS) {
    LimVal<-Limit[which(CAS==X)]
    #if the value d.n.e set keep all hits
    if (length(LimVal)==0) {
      LimVal<-999
    }
    #Test to see if X is element of ChemMasterListFlatCytotox.EAR
    Out<-ChemMasterListFlat.EAR[,X]*{ChemMasterListFlat.EAR[,X] < LimVal}
    if (length(which(Out==0))>0) {
      Out[which(Out==0)]<-1000
    }
    return(Out)
  }, Limit, CAS)
return(TRUE)
}

#####
#####
ApplySelection.EAR<-function(UID,Data) {
#This function selects one value for the AC50 of an assay-chemical combination
#Data is the data set to be collapsed
#UID is the unique assay chemical combination

  SubLoc<-which(Data[['UID']]==UID)
  SubData<-Data[SubLoc, ]
  print(UID)
#Use the most conservative
  UseRow<-which(SubData[['AC.50']]==min(SubData[['AC.50']]))[1]

return(SubData[UseRow, ])
}

#####
#####
FilterDataFlags<-function(Data, Remove) {

```

```
#Filters out specific flag_ids
```

```
Flags<-Data[['flag_ids']]
Flags<-strsplit(Flags,split='[[ ]')

Keep<-unlist(lapply(Flags,function(X){
  return(sum(is.element(as.numeric(X),Remove))==0)
}))
```

```
Data<-Data[Keep, ]
return(Data)
}
```

```
#####
#####
```

```
#####
#####
```

```
##                               GUI
Functions                          ##
```

```
#####
#####
```

```
#####
#####
```

```
#This file contains all the functions used in the front end user Interface
```

```
#This is the back end to the that handles plotting
```

```
#####
#####
```

```
#
Global                               #
```

```
#####
#####
```

```
#Global values
```

```
#Warnings.EAR
```

```
  #List data structure [[1]] contains it's length will each element is a warning to the
  user
```

```
#ChemMasterList.EAR
```

```
  #Data Set containing assays for all the chemical
```

```
#ChemMasterListFlat.EAR
```

```
  #Data Set containing assays for all the chemical flattened into a matrix of chemical by
  assay \
```

```
#ChemMasterListFlatCytotox.EAR
```

```
  #Data Set containing assays for all the chemical flattened into a matrix of chemical by
  assay
```

```
    #This is adjusted to in a way s.t no EC50s can be Cytotoxic
```

```
#CytotoxInfo.EAR
```

```
  #Data Structure that store the Cytotoxic information for every chemical
```

```
#ChemInfoList.EAR
```

```
  #A data set containing the Names, CAS numbers, molecular weights, and Formulas of the
```

```
chemicals
#AssayGroup.EAR
#Hash table containing Assay groups where group name is a key
#FunctionList.EAR
#This contains the names of all functions and pre-set globals in the EAR Calculator
#SitesList.EAR
#A vector of stings containing the sites to plot
#ChemicalsList.EAR
#A vector of stings containing the chemicals to plot
#AssayList.EAR
#A vector of stings containing the Assay to plot
#SortList.EAR
#A vector of stings containing the possible sort criteria
#MainData.EAR
#The chemical survey data loaded into
#CanRun.EAR
#Bool indicates a whether or not a plot can be made
#Results.EAR
#S3 Data structure contain the results information from RunEARAll
#Replot.EAR
#Bool indicate that a plot has already been created
```

```
#Global GUI containers and objects
```

```
#StartGUI.EAR
#MainWindow.EAR
#Main window for data entry form on the EAR Calculator
#Maingroup.EAR
#Largest group containing
#ButtonBox.EAR
#Box containing the all the buttons for StartGUI.EAR
#DataBox.EAR
#The frame containing the table the data is stored in
#DataGrid.EAR
#The table object the data is contained within
#RunButton.EAR
#Button to run EAR Calculations
#ShowData.EAR
#Data displayed in the windaow
#OpenReulstsButton.EAR
#Calls the window containing the plotting options
```

```
#PlotViewerGUI.EAR
#Replot.EAR
#Bool indicating a plot has been created
#SelectSiteLabel.EAR
#Displays the selected site
#SelectChemicalLabel.EAR
#Displays the selected chemical
#SelectAssayLabel.EAR
#Displays the selected assay
#GroupSelectCBox.EAR
#Combo box for selecting how to collapse one of the dimensions of EARCube
#XMinSelectionCbox.EAR
```

```

#The minimum index to plot on the x-axis
#XMaxSelectionCbox.EAR
#The maximum index to plot on the x-axis
#YMinSelectionCbox.EAR
#The minimum index to plot on the y-axis
#YMaxSelectionCbox.EAR
#The maximum index to plot on the y-axis
#SCritSelectionCbox.EAR
#Combo box for selecting the sort criteria
#ThresholdSelectionCbox.EAR
#Combo box for selecting the minimum value a row and column must contain to show up
the plot
#SwitchAxisCbox.EAR
#Combo box containing a Bool indicating if axes should be switch
#DetectionLimitCbox.EAR
#Combo box containing the selection for how to handle values under the detection
limit

```

```

#Temps
#TempData.EAR
#Temporary Assay information
#Flags.EAR
#ID flags to be removed

```

```

#####
#####
#
#                               Function
List                               #
#####
#####

```

```
#Install.EAR
```

```
#Run.EAR
```

```

#SetFunctionList
#Main.EAR
#StartGUI.EAR           [StartButton]
#open_cb.EAR           [LoadButton]
#CheckData.EAR         [RunButton.EAR]
#ConvertChemData       [RunButton.EAR]
#ConvertChemData
#FilterChemData
#Convert2ug
#Find Detects
#GetShowData.EAR       [RunButton.EAR]
#CalculatedAllEAR      [RunButton.EAR]
#CalculateEAR3D
#GetAC50All
#GetAC50ListAll
#CalculateEARAll
#GetMW
#Convert2uM

```

```

#PlotViewerGUI.EAR      [OpenReulstsButton.EAR]
  #GetSitesWindowPop    [SelectSiteButton]
  #GetChemicalsWindowPop [SelectChemicalButton]
  #GetAssayWindowPop    [SelectAssayButton]
  #CheckPlot            [UpdateGraphButton] [SaveGraphButton]
  [SaveEARButton]
  #MainPlotEARAll       [UpdateGraphButton] [SaveGraphButton]
  #GetFileName          [SaveGraphButton]
  #ApplyUnderLimit      [SaveEARButton]
  #SumOverAllAssays    [SaveEARButton]
  #FilterEARDataAll    [SaveEARButton]
  #SortDataAll          [SaveEARButton]
  #PrepEARSave          [SaveEARButton]
  #save_cb              [SaveEARButton]
#ReadMeFile.EAR        [ReadMeButton]
  #Reference.EAR
  #ShowChangeLog.EAR
#UpdateAssayGUI.EAR    [UpdateAssayButton]
  #UpdateEARCalculator
    #Melt.EAR
      #GetColumn.Melt.EAR
      #GetRow.GetColumn.Melt.EAR
    #SaveWorkSpace
    #Which.Apply
#UpdateChemicalGUI.EAR [UpdateChemicalButton]
  #UpdateEARCalculator
    #Melt.EAR
      #GetColumn.Melt.EAR
      #GetRow.GetColumn.Melt.EAR
    #SaveWorkSpace
    #Which.Apply
#UpdateCyttox.EAR      [UpdateCyttoxButton]
  #open_cb
  #SaveEARInformation
    #UpdateEARCalculator
      #SaveWorkSpace
      #ApplyCyttox

```

```

#####
#####

```

```

#                               Function

```

```

Information                               #

```

```

#####
#####

```

```

#Install.EAR

```

```

  #Function to install the packages needed to run the EAR calculator

```

```

  #Inputs

```

```

    #Folder

```

```

      #Folder to install the packages to; defaults to current directory

```

```
#Output
#NULL
```

```
#Called By
#NOTHING
```

```
#Calls Directly \ Indirectly
#NOTHING
```

```
#####
#####
```

```
#Run.EAR
```

```
#Function used to load all the needed packages and call the main window for the EAR
Calculator
```

```
#Inputs
```

```
#Folder
#Folder to install the packages to; defaults to current directory
```

```
#Output
```

```
#Called By
#NOTHING
```

```
#Calls Directly \ Indirectly
```

```
#SetFunctionList
```

```
#Main.EAR
```

```
#StartGUI.EAR [StartButton]
```

```
#open_cb.EAR [LoadButton]
```

```
#CheckData.EAR [RunButton.EAR]
```

```
#ConvertChemData [RunButton.EAR]
```

```
#ConvertChemData
```

```
#FilterChemData
```

```
#Convert2ug
```

```
#Find Detects
```

```
#GetShowData.EAR [RunButton.EAR]
```

```
#CalculatedAllEAR [RunButton.EAR]
```

```
#CalculateEAR3D
```

```
#GetAC50All
```

```
#GetAC50ListAll
```

```
#CalculateEARAll
```

```
#GetMW
```

```
#Convert2uM
```

```
#PlotViewerGUI.EAR [OpenReulstsButton.EAR]
```

```
#GetSitesWindowPop [SelectSiteButton]
```

```
#GetChemicalsWindowPop [SelectChemicalButton]
```

```
#GetAssayWindowPop [SelectAssayButton]
```

```
#CheckPlot [UpdateGraphButton] [SaveGraphButton]
```

```
[SaveEARButton]
```

```
#MainPlotEARAll [UpdateGraphButton] [SaveGraphButton]
```

```
#GetFileName [SaveGraphButton]
```

```
#ApplyUnderLimit [SaveEARButton]
```

```
#SumOverAllAssays [SaveEARButton]
```

```
#FilterEARDataAll [SaveEARButton]
```

```

#SortDataAll [SaveEARButton]
#PrepEARSave [SaveEARButton]
#save_cb [SaveEARButton]
#ReadMeFile.EAR [ReadMeButton]
#Reference.EAR
#ShowChangeLog.EAR
#UpdateAssayGUI.EAR [UpdateAssayButton]
#UpdateEARCalculator
#Melt.EAR
#GetColumn.Melt.EAR
#GetRow.GetColumn.Melt.EAR
#SaveWorkSpace
#Which.Apply
#UpdateUpdateAssayGUI.EAR
#FilterDataFlags
#UpdateChemicalGUI.EAR [UpdateChemicalButton]
#UpdateEARCalculator
#Melt.EAR
#GetColumn.Melt.EAR
#GetRow.GetColumn.Melt.EAR
#SaveWorkSpace
#Which.Apply
#UpdateCyttox.EAR [UpdateCyttoxButton]
#open_cb
#SaveEARInformation
#UpdateEARCalculator
#SaveWorkSpace
#ApplyCyttox

```

```

#####
#####

```

```
#SetFunctionList
```

```
#Sets the list of functions and globals for the EAR Calculator
```

```
#Inputs
```

```
#NOTHING
```

```
#Output
```

```
#Function List
```

```
#Called By
```

```
#Run.EAR
```

```
#Calls Directly \ Indirectly
```

```
#NOTHING
```

```
#####
#####

```

```
#Main.EAR
```

```
#Function call for opening the Main Window for the EAR Calculator
```

```
#Inputs
```

```
#NOTHING
```



```

#Output
  #NULL

#Called By
  #Run.EAR

#Calls Directly \ Indirectly
  #StartGUI.EAR           [StartButton]
  #open_cb.EAR           [LoadButton]
  #CheckData.EAR         [RunButton.EAR]
  #ConvertChemData       [RunButton.EAR]
    #ConvertChemData
    #FilterChemData
    #Convert2ug
  #Find Detects
  #GetShowData.EAR       [RunButton.EAR]
  #CalculatedAllEAR      [RunButton.EAR]
    #CalculateEAR3D
    #GetAC50All
    #GetAC50ListAll
    #CalculateEARAll
    #GetMW
    #Convert2uM
  #PlotViewerGUI.EAR     [OpenReulstsButton.EAR]
    #GetSitesWindowPop   [SelectSiteButton]
    #GetChemicalsWindowPop [SelectChemicalButton]
    #GetAssayWindowPop   [SelectAssayButton]
    #CheckPlot            [UpdateGraphButton] [SaveGraphButton]
    [SaveEARButton]
    #MainPlotEARAll      [UpdateGraphButton] [SaveGraphButton]
    #GetFileName         [SaveGraphButton]
    #ApplyUnderLimit     [SaveEARButton]
    #SumOverAllAssays    [SaveEARButton]
    #FilterEARDataAll    [SaveEARButton]
    #SortDataAll         [SaveEARButton]
    #PrepEARSave         [SaveEARButton]
    #save_cb             [SaveEARButton]

```

```

#####
####

```

```

#ReadMeFile.EAR
  #Shows authers and refrences

```

```

#Inputs
  #NOTHING

```

```

#Output
  #OTHING

```

```

#Called By
  #Run.EAR

#Calls Directly \ Indirectly

```

```
#Reference.EAR
#ShowChangeLog.EAR
```

```
#####
#####
```

```
#Reference.EAR
#Shows the references
```

```
#Inputs
#NOTHING
```

```
#Output
#OTHING
```

```
#Called By
#ReadMeFile.EAR
#Calls Directly \ Indirectly
#NOTHING
```

```
#####
#####
```

```
#ShowChangeLog.EAR
#Shows all the changes to the program
```

```
#Inputs
#NOTHING
```

```
#Output
#OTHING
```

```
#Called By
#ReadMeFile.EAR
#Calls Directly \ Indirectly
#NOTHING
```

```
#####
#####
```

```
#UpdateAssayGUI.EAR
#Calls the entry form to load an updated assay file
```

```
#Inputs
#NOTHING
```

```
#Outputs
#NOTHING
#Will erase everything not in FunctionList.EAR
#Will save the current R Work Space to disk
```

```
#Called By
#Main.EAR
#Calls Directly \ Indirectly
#open_cb
#LoadAssayInformation
#ApplySelection
```

```

#MergeAssayInformation
  #ApplySelection
#SaveEARInformation
  #UpdateEARCalculator
    #Melt.EAR
      #GetColumn.Melt.EAR
        #GetRow.GetColumn.Melt.EAR
    #SaveWorkSpace
    #Which.Apply
#UpdateUpdateAssayGUI.EAR      [RemovedFlagsButton]
#FilterDataFlags              [RemovedFlagsButton]

```

```

#####
#####

```

```

#open_cb
  #Loads a CSV file

#Inputs
  #widget
    #Temporary widget
  #window
    #Temporary window

#Output
  #df
    #The loaded CSV as a data frame

#Called By
  #UpdateAssayGUI.EAR
  #UpdateChemicalGUI.EAR
#Calls Directly \ Indirectly
  #NOTHING

```

```

#####
#####

```

```

#SaveEARInformation
  #Saves the EAR Calculator with updated information

#Inputs
  #OldData
    #The old data frame, either Assay information or chemical information
  #NewData
    #The new data frame, either Assay information or chemical information
  #Name
    #Name of the information type being updated either 'Chemical' or 'Assay'

#Outputs
  #NOTHING
  #Will erases everything not in FunctionList.EAR
  #Will save the current R Work Space to disk

```

```

#Called By
  #UpdateAssayGUI.EAR
  #UpdateChemicalGUI.EAR
  #UpdateAssayGroup.EAR
  #UpdateCyttox.EAR
#Calls Directly \ Indirectly
  #UpdateEARCalculator
    #Melt.EAR
      #GetColumn.Melt.EAR
        #GetRow.GetColumn.Melt.EAR
    #SaveWorkSpace
    #Which.Apply

```

```
#####
```

```
#####
```

```

#UpdateEARCalculator
  #Updates the EAR Calculator File
  #This writes a new R Data base file at a location

#Inputs
  #NewData
    #The new data to be updated
  #Name
    #Name of the information type being updated either 'Chemical', 'Assay', or
    'AssayGroup'

#Output
  #NOTHING
  #Will erase everything not in FunctionList.EAR
  #Will save the current R Work Space to disk

```

```

#Called By
  #SaveEARInformation
#Calls Directly \ Indirectly
  #DefaultAssayGroups
  #Melt.EAR
    #GetColumn.Melt.EAR
      #GetRow.GetColumn.Melt.EAR
  #SaveWorkSpace
  #Which.Apply
  #ApplyCyttox

```

```
#####
```

```
#####
```

```

#SaveWorkSpace
  #Saves the current R workspace

#Inputs
  #widget
    #Temporary widget
  #window

```

```
#Temporary window
```

```
#Outputs
```

```
#NOTHING
```

```
#Writes an R data base file to disk
```

```
#Called By
```

```
#UpdateEARCalculator
```

```
#Calls Directly \ Indirectly
```

```
#NOTHING
```

```
#####  
#####
```

```
#UpdateChemicalGUI.EAR
```

```
#Updates the EAR Calculator with new Information about Chemicals
```

```
#Inputs
```

```
#NOTHING
```

```
#Outputs
```

```
#NOTHING
```

```
#Will erase everything not in FunctionList.EAR
```

```
#Will save the current R Work Space to disk
```

```
#Called By
```

```
#Main.EAR
```

```
#Calls Directly \ Indirectly
```

```
#open_cb
```

```
#SaveEARInformation
```

```
#UpdateEARCalculator
```

```
#Melt.EAR
```

```
#GetColumn.Melt.EAR
```

```
#GetRow.GetColumn.Melt.EAR
```

```
#SaveWorkSpace
```

```
#Which.Apply
```

```
#####  
#####
```

```
#UpdateAssayGroup.EAR
```

```
#Updates the EAR Calculator with new Assay Groups
```

```
#Inputs
```

```
#NOTHING
```

```
#Outputs
```

```
#NOTHING
```

```
#Will erase everything not in FunctionList.EAR
```

```
#Will save the current R Work Space to disk
```

```
#Called By
```

```
#Main.EAR
```

```
#Calls Directly \ Indirectly
```

```
#open_cb
```

```
#SaveEARInformation
```

```
#UpdateEARCalculator
```

```

#Melt.EAR
  #GetColumn.Melt.EAR
    #GetRow.GetColumn.Melt.EAR
#SaveWorkSpace
#Which.Apply

```

```

#####
#####

```

```

#UpdateCyttox.EAR
  #Front end to update the Cytotoxic information

#Inputs
  #NOTHING
#Outputs
  #NOTHING
  #Will erase everything not in FunctionList.EAR
  #Will save the current R Work Space to disk
  #Modifies global variables of:
    #Cyttox.EAR
    #ChemMasterListFlatCytotox.EAR

```

```

#Calls Directly \ Indirectly
  #open_cb
  #SaveEARInformation
    #UpdateEARCalculator
      #SaveWorkSpace
      #ApplyCyttox

```

```

#####
#####

```

```

#StartGUI.EAR
  #Function call for data entry form

#Inputs
  #NOTHING

#Objects
  #MainWindow.EAR
    #Main window for data entry form on the EAR Calculator
  #Maingroup.EAR
    #<MainWindow.EAR>
    #Largest group containing
  #ButtonBox.EAR
    #<Maingroup.EAR >
    #Box containing the all the buttons for StartGUI.EAR
  #LoadButton
    #<ButtonBox.EAR>
    #Buttion calls the functions used to load the data
  #DataBox.EAR
    #<Maingroup.EAR >
    #The frame containing the table the data is stored in

```

```

#DataGrid.EAR
  #<DataGrid.EAR>
  #The table object the data is contained within
#RunButton.EAR
  #<ButtonBox.EAR>
  #Button to run EAR Calculations
#ShowData.EAR
  #<ButtonBox.EAR>
  #Data displayed in the window
#ExportDataButton.EAR
  #<ButtonBox.EAR>
  #Exports the cleaned data set
#ExportUnderTestButton.EAR
  #<ButtonBox.EAR>
  #Exports the assays that have an AC50 under the lowest tested amount
#OpenReulstsButton.EAR
  #<ButtonBox.EAR>
  #Calls the window containing the plotting options

```

```

#OutPut
  #NULL

```

```

#Called By

```

```

  #Run.EAR

```

```

#Calls Directly \ Indirectly

```

```

  #open_cb.EAR          [LoadButton]

```

```

  #CheckData.EAR       [RunButton.EAR]

```

```

  #ConvertChemData     [RunButton.EAR]

```

```

    #ConvertChemData

```

```

      #FilterChemData

```

```

    #Convert2ug

```

```

#Find Detects

```

```

  #GetShowData.EAR     [RunButton.EAR]

```

```

  #CalculatedAllEAR    [RunButton.EAR]

```

```

    #CalculateEAR3D

```

```

      #GetAC50All

```

```

      #GetAC50ListAll

```

```

      #CalculateEARAll

```

```

    #GetMW

```

```

    #Convert2uM

```

```

  #ConvertChemData     [ExportDataButton.EAR]

```

```

  #PlotViewerGUI.EAR   [OpenReulstsButton.EAR]

```

```

#####
#####

```

```

#open_cb.EAR

```

```

  #Opens an EAR formatted CSV file

```

```

#widget

```

```

  #Temporary widget

```

```

#window

```

```

  #Temporary window

```

```
#Objects
  #dialog
    #dialogue box used to select a file
```

```
#Output
  #df
    #a data frame
```

```
#Called By
  #StartGUI.EAR [LoadButton]
#Calls Directly \ Indirectly
  #NOTHING
```

```
#####
```

```
#####
#CheckData.EAR
  #Function used to check for problems in the data
  #Function is a place holder to be altered when needed as problems in input may arive
```

```
#Inputs
  #Data
    #Data frame to be checked
```

```
#Output
  #TRUE or FALSE
```

```
#Called By
  #StartGUI.EAR [RunButton.EAR]
#Calls Directly \ Indirectly
  #NOTHING
```

```
#####
```

```
#####
#GetShowData.EAR
  #Function that combines the data set for display
```

```
#Inputs
  #SiteData
    #Site data from results output CalculatedAllEAR
  #ChemData
    #Site data from results output CalculatedAllEAR
  #CAS
    #CAS data from results output CalculatedAllEAR
```

```
#Output
  #A data frame meant to be displayed
```

```
#Called By
  #StartGUI.EAR [RunButton.EAR]
#Calls Directly \ Indirectly
```



```
#NOTHING
```

```
#####  
#####  
#PlotViewerGUI.EAR  
  #Function call for bringing up the plot selection window  
  
#Inputs  
  #NOTHING  
  #Uses Global Results.EAR  
  
#Objects  
  #PlotWindow  
    #NOTHING  
    #Main window container  
  #Maingroup  
    #<PlotWindow>  
    #group containing all other containers  
  #ControlBox  
    #<Maingroup>  
    #Frame containing all the widjets relating to graph controls  
  #SelectSiteButton  
    #<ControlBox>  
    #Button to call the site selection window  
  #SelectSiteFrame  
    #<ControlBox>  
    #Frame containing what sites are selected  
  #SelectSiteLabel.EAR  
    #<SelectSiteFrame>  
    #Label containing the selected sites  
  #SelectChemicalButton  
    #<ControlBox>  
    #Button to call the chemical selection window  
  #SelectChemicalFrame  
    #<ControlBox>  
    #Frame containing what Chemical are selected  
  #SelectChemicalLabel.EAR  
    #<SelectChemicalFrame>  
    #Label containing the selected chemical  
  #SelectAssayButton  
    #<ControlBox>  
    #Button to call the assay selection window  
  #SelectAssayFrame  
    #<ControlBox>  
    #Frame containing what assays are selected  
  #SelectAssayLabel.EAR  
    #<SelectAssayFrame>  
    #Label containing the selected assay  
  #GroupSelectFrame  
    #<ControlBox>  
    #Frame containing the combo box that is used to  
  #GroupSelectCBox.EAR
```

```
#<GroupSelectFrame>
#Combo box containing the values to collapse one of the dimensions of the EARCube
#XRangeFrame
#<ControlBox>
#Box containing the min and max values for the x-axis
#XMinSelectionCbox.EAR
#<XRangeFrame>
#The minimum index to plot on the x-axis
#XMaxSelectionCbox.EAR
#<XRangeFrame>
#The maximum index to plot on the x-axis
#YRangeFrame
#<ControlBox>
#Box containing the min and max values for the y-axis
#YMinSelectionCbox.EAR
#<YRangeFrame>
#The minimum index to plot on the y-axis
#YMaxSelectionCbox.EAR
#<YRangeFrame>
#The maximum index to plot on the y-axis
#SCritFrame
#<ControlBox>
#Box containing the combo box for the sort criteria
#SCritSelectionCbox.EAR
#<SCritFrame>
#Combo box for selecting the sort criteria
#ThresholdFrame
#<ControlBox>
#box containing the combo box for threshold selection
#ThresholdSelectionCbox.EAR
#<ThresholdFrame>
#combo box containing the threshold criteria
#SwitchAxisFrame
#<ControlBox>
#Box containing the combo box for switching the axes
#SwitchAxisCbox.EAR
#<ThresholdFrame>
#Combo box containing bool which indicate the what is on each axis
#DetectionLimitFrame
#<ControlBox>
#Box containing the the detection limit combo box
#DetectionLimitCbox.EAR
#<DetectionLimitCbox.EAR>
#Combo box containing the values that dictate how measurements under the detection
limit are handled.
#UpdateGraphButton
#<ControlBox>
#Button that updates the graph
#SaveGraphButton
#<ControlBox>
#Button that saves the graph to a PDF
#SaveEARButton
#<ControlBox>
```

```

    #Button that saves the EAR Values to a csv file
#ExportTheshButton
    #<ControlBox>
    #Button that saves information about EAR Values above the threshold to a csv file
#GraphBox
    #<Maingroup>
    #Box containing the graph object
#Graphs
    #<GraphBox>
    #object that is used as the plotting window

```

```

#Called By
    #StartGUI.EAR          [OpenReulstsButton.EAR]
#Calls Directly \ Indirectly
    #GetSitesWindowPop    [SelectSiteButton]
    #GetChemicalsWindowPop [SelectChemicalButton]
    #GetAssayTypeWindowPop [SelectAssayButton]
        #GetAssayWindowPop [AssayButton]
        #GetAssayGroupWindowPop [AssayGroupButton]

    #CheckPlot            [UpdateGraphButton] [SaveGraphButton] [SaveEARButton]
    #MainPlotEARAll       [UpdateGraphButton] [SaveGraphButton]
    #GetFileName           [SaveGraphButton]
    #ApplyUnderLimit      [SaveEARButton]
    #SumOverAllAssays     [SaveEARButton]
    #FilterEARDataAll     [SaveEARButton]
    #SortDataAll          [SaveEARButton]
    #PrepEARSave          [SaveEARButton]
    #save_cb              [SaveEARButton]

```

```

#####
#####

```

```

#GetSitesWindowPop
    #Function that pops up a window to select the sites to be graphed

```

```

#Inputs
    #ResultsEAR
    #Results from CalculatedAllEAR

```

```

#Output
    #NOTHING
    #Alters Global:
        #SitesList.EAR
        #SelectSiteLabel.EAR

```

```

#Called By
    #PlotViewerGUI.EAR    [SelectSiteButton]
#Calls Directly \ Indirectly
    #NOTHING

```

```
#####  
#####  
#GetChemicalsWindowPop  
#Function that pops up a window to select the chemicals to be graphed  
  
#Inputs  
#ResultsEAR  
#Results from CalculatedAllEAR  
  
#Output  
#NOTHING  
#Alters Global:  
#ChemicalsList.EAR  
#SelectChemicalLabel.EAR  
  
#Called By  
#PlotViewerGUI.EAR [SelectChemicalButton]  
#Calls Directly \ Indirectly  
#NOTHING  
  
#####  
#####  
#GetAssayTypeWindowPop  
#Function that pops up a window to select the how the assays are selected  
  
#Inputs  
#ResultsEAR  
#Results from CalculatedAllEAR  
  
#Output  
#NOTHING  
  
#Called By  
#PlotViewerGUI.EAR [SelectAssayButton]  
#Calls Directly \ Indirectly  
#GetAssayWindowPop [AssayButton]  
#GetAssayGroupWindowPop [AssayGroupdButton]  
  
#####  
#GetAssayWindowPop  
#Function that pops up a window to select the assays to be graphed  
  
#Inputs  
#ResultsEAR  
#Results from CalculatedAllEAR  
  
#Output  
#NOTHING  
#Alters Global:  
#AssayList.EAR  
#SelectAssayLabel.EAR
```

```
#Called By
  #GetAssayWindowPop          [AssayButton]
#Calls Directly \ Indirectly
  #NOTHING
```

```
#####
```

```
#GetAssayGroupWindowPop
  #Used to define what assays to by groups
```

```
#Inputs
  #NOTHING
  #Uses global AssayGroup.EAR
```

```
#Output
  #NOTHING
  #Alters Global:
    #AssayList.EAR
    #SelectAssayLabel.EAR
```

```
#Called By
  #GetAssayWindowPop          [AssayGroupButton]
#Calls Directly \ Indirectly
  #NOTHING
```

```
#####
#####
```

```
#CheckPlot
  #Function that checks the input parameters for a plot and warn the user if conditions are
  not met
```

```
#Inputs
  #XMin
    #Minimum plotting index for the x-axis
  #XMax
    #Maximum plotting index for the x-axis
  #YMin
    #Minimum plotting index for the y-axis
  #YMax
    #Maximum plotting index for the y-axis
  #SCrit
    #Sorting criteria
  #MCrit
    #Multiple selection criteria
```

```
#Output
  #Check
    #Bool indicating that a plot can be made
```

```
#Called By
  #PlotViewerGUI.EAR          [UpdateGraphButton] [SaveGraphButton] [SaveEARButton]
```

```
#Calls Directly \ Indirectly
#NOTHING
```

```
#####
#####
```

```
#GetFileName
```

```
#Window to save the output
```

```
#Inputs
```

```
#widget
```

```
#Temporary widget
```

```
#window
```

```
#Temporary window
```

```
#Output
```

```
#FileOut
```

```
#Name of a file
```

```
#Called By
```

```
#PlotViewerGUI.EAR
```

```
[SaveGraphButton]
```

```
#Calls Directly \ Indirectly
```

```
#NOTHING
```

```
#####
#####
```

```
#save_cb
```

```
#Window to save the output
```

```
#Inputs
```

```
#widget
```

```
#Temporary widget
```

```
#window
```

```
#Temporary window
```

```
#OutData
```

```
#Data to be saved
```

```
#Output
```

```
#NOTHING
```

```
#Called By
```

```
#PlotViewerGUI.EAR
```

```
[SaveEARButton]
```

```
#Calls Directly \ Indirectly
```

```
#save_file
```

```
#####
#####
```

```
#save_file
```

```
#saves a file as a csv
```

```
#Inputs
```

```
#File
```

```
#File name and location
```

```
#OutData
```

```
#Data to be saves
```

```
#Output
```

```
#NOTHING
```

```
#Writes a csv to disk
```

```
#Called By
```

```
#PlotViewerGUI.EAR [SaveEARButton]
```

```
#Calls Directly \ Indirectly
```

```
#NOTHING
```

```
#####
#####
```

```
#pop_message
```

```
#Function for displaying messages to the user
```

```
#Inputs
```

```
#message
```

```
#A message to be displayed to the user
```

```
#Outputs
```

```
#NOTHING
```

```
#Called By
```

```
#Most GUI functions
```

```
#Calls Directly \ Indirectly
```

```
#NOTHING
```

```
#####
#####
```

```
#PrepEARSave
```

```
#Prepares the EAR value so they can be saved to an csv
```

```
#Inputs
```

```
#Data
```

```
#Filterd results from the EAR Calculator
```

```
#SwitchAxis
```

```
#Bool indicating that the axes are switched
```

```
#Outputs
```

```
#DataOut
```

```
#EAR values identical to what is being displayed in the adjacent plot
```

```
#Called By
```

```
#PlotViewerGUI.EAR [SaveEARButton]
```

```
#Calls Directly \ Indirectly
```

```
#NOTHING
```

```
#####
#####
```

```
#DefineCategory
```

```
#Calls the window for entering the plotting categories
```

```
#Inputs
  #NOTHING
```

```
#Outputs
  #Changes
    #PlottingCat.EAR
    #BlueLable.EAR
    #GreenLable.EAR
    #RedLable.EAR
```

```
#Called By
  #PlotViewerGUI.EAR      [DefineCatButton]
```

```
#Calls Directly \ Indirectly
  #NOTHING
```

```
#####
#####
```

```
#SelectFlags
  #Selects the Flag ID's to remove from the data set
```

```
#Inputs
  #NOTHING
```

```
#Outputs
  #Changes
    #Flags.EAR
```

```
#Called By
  #UpdateUpdateAssayGUI.EAR      [RemovedFlagsButton]
```

```
#Calls Directly \ Indirectly
  #NOTHING
```

```
#####
#####
```

```
#
Functions
```

```
#####
#####
```

```
Install.EAR<-function(Folder=NULL) {
#used to install the packages needed for the EAR Calculator
```

```
#Set private library is need be
if (is.null(Folder)==FALSE) {
  dir.create(Folder, showWarnings = FALSE)
  R_LIBS_USER=Folder
  .libPaths(R_LIBS_USER)
```



```

}
#install packages
install.packages('RGtk2',dependencies ="Depends" )
install.packages('R2HTML',dependencies ="Depends")
install.packages('gWidgetsRGtk2',dependencies ="Depends")
#install.packages('webchem',dependencies ="Depends")
install.packages('cairoDevice',dependencies ="Depends")
install.packages('abind',dependencies ="Depends")

#prompt the installation of GTK+
library(RGtk2)
}
#####
#####

Run.EAR<-function(Folder=NULL) {
#Function used to run the EAR Calculator
#Use private library is need be
#last updated 12-24-2015 JS

if (is.null(Folder)==FALSE) {
  dir.create(Folder, showWarnings = FALSE)
  R_LIBS_USER=Folder
  .libPaths (R_LIBS_USER)
}

require(RGtk2)
require(gWidgetsRGtk2)
require(R2HTML)
#library(webchem)
require(cairoDevice)
require(abind)

#Define global PlottingCat.EAR
PlottingCat.EAR<<-c(0.1,1,10)
#Set function list
FunctionList.EAR<<-SetFunctionList ()

Main.EAR()
}
#####
#####

SetFunctionList<-function() {
#Sets the list of functions and globals for the EAR Calculator
#Update if functions are added
FunctionList<-c("ApplyCharLimit","ApplyUnderLimit","CalcChemWieght","CalculatedAllEAR",
"CalculateEAR3D","CalculateEARAll","CheckData.EAR",
"CheckPlot","ChemInfoList.EAR","ChemMasterList.EAR","ChemMasterListFlat.EAR","CollapseData",
"Convert2ug","Convert2uM","ConvertChemData",
"FilterChemData","FilterEARDataAll","FindDetects","GetAC50All","GetAC50ListAll",
"GetAssayWindowPop","GetChemicalsWindowPop","Get_col",
"GetColumn.Melt.EAR","GetFileName","GetIndexVec","GetLocation","GetMW","GetpchGUI","GetpchPDF",
"GetRow.GetColumn.Melt.EAR","GetShowData.EAR",
"GetSitesWindowPop","GetValueOverCube","InfoFile","Install.EAR","Main.EAR","MainPlotEARAll",
"MasterFile","Melt.EAR","open_cb","open_cb.EAR",

```

```
"PlotEARAll", "PlotViewerGUI.EAR", "pop_message", "Run.EAR", "RunEARAll", "save_cb", "save_file",
"SaveOldInformation", "SavePlotEARAll",
"SaveWorkSpace", "SetFunctionList", "SortDataAll", "StartGUI.EAR", "SumOverAllAssays", "UnderToWhite"
, "UpdateAssayGUI.EAR", "UpdateChemicalGUI.EAR",
"UpdateEARCalculator", "Which.Apply", "WhichOverMinMax", 'FunctionList.EAR', 'ReadMeFile.EAR',
' ShowChangeLog', 'Reference.EAR', 'PrepEARSave',
'AssayGroup.EAR', 'UpdateAssayGroup.EAR', 'AboveThreshold', 'GetAssayTypeWindowPop',
'GetAssayGroupWindowPop', 'DefaultAssayGroups', 'ApplySelection',
'LoadAssayInformation', 'MergeAssayInformation', 'DefineCategory', 'ChemMasterListFlatCytotox.EAR',
'UpdateCyttox.EAR', 'CyttoxInfo.EAR', 'ApplyCyttox',
'Warnings.EAR', 'SelectFlags', 'FilterDataFlags', 'ShowChangeLog.EAR', 'Flags.EAR'
)
```

```
return(FunctionList)
}
```

```
#####
#####
```

```
Main.EAR<-function() {
```

```
#main GUI call for EAR Calculator
```

```
#Globals (.EAR designates a global)
```

```
  SitesList.EAR<<-'All'
```

```
  ChemicalsList.EAR<<-'All'
```

```
  AssayList.EAR<<-'All'
```

```
  SortList.EAR<<-c('Color', 'Mean', 'Sum', 'Median', 'Active')
```

```
  MainData.EAR<<-NULL
```

```
  CanRun.EAR<<-FALSE
```

```
  Results.EAR<<-NULL
```

```
  ShowData.EAR<<-NULL
```

```
  Warnings.EAR<<-list()
```

```
  Warnings.EAR$N<<-1
```

```
#This contains all the function and globals that are in the EAR Calculator program
```

```
#This list needs to be updated if more function are added later
```

```
#Introductory Window
```

```
#Changed on 1-4-2016 to allow for more options
```

```
IntroWindow<-gwindow(horizontal = FALSE, "EAR Calculator ", visible=FALSE, expand=TRUE, fill=
TRUE)
```

```
  size(IntroWindow)<-c(800, 700)
```

```
  IntroTextframe<-gframe(horizontal = FALSE, container=IntroWindow, where="center", expand=
TRUE, fill=TRUE)
```

```
  IntroTextMessage1<-glabel('Welcome to', container=IntroTextframe, where="center")
```

```
  #Title1
```

```
    font(IntroTextMessage1)<-list(size=34, color='Black')
```

```
  IntroTextMessage2<-glabel('The EAR Calculator', container=IntroTextframe, where=
"center") #Title1
```

```
    font(IntroTextMessage2)<-list(size=34, color='Black')
```

```
  IntroTextMessage3<-glabel('March 23, 2016', container=IntroTextframe, where="center")
```

```
  #Title2 #Update This
```

```

font (IntroTextMessage3) <-list (size=16,color='Black')
IntroTextMessage4<-glabel ('Beta V0.76 -Developmental-', container=IntroTextframe,
where="center") #Title2
font (IntroTextMessage4) <-list (size=16,color='Black')
BlankSpace<-gframe (container=IntroTextframe,where="center") #Blank space for formats
size (BlankSpace) <-c (1, 75)
Group1<-gggroup (container=IntroTextframe, horizontal = FALSE, expand=TRUE, fill=TRUE)
ReadMeButton<-gbutton ('Read Me', container=Group1, handler= function (h, ...) {
  ReadMeFile.EAR ()
})
size (ReadMeButton) <-c (80, 60)
font (ReadMeButton) <-list (size=24,color='Black')
StartButton<-gbutton ('EAR Calculator', container=Group1, handler= function (h, ...) {
  StartGUI.EAR ()
})
size (StartButton) <-c (80, 60)
font (StartButton) <-list (size=24,color='Black')

UpdateAssayButton<-gbutton ('Update Assay', container=Group1, handler= function (h, ...) {
  UpdateAssayGUI.EAR ()
})
size (UpdateAssayButton) <-c (80, 60)
font (UpdateAssayButton) <-list (size=24,color='Black')
UpdateChemicalButton<-gbutton ('Update Chemical', container=Group1, handler= function (
h, ...) {
  UpdateChemicalGUI.EAR ()
})
size (UpdateChemicalButton) <-c (80, 60)
font (UpdateChemicalButton) <-list (size=24,color='Black')

UpdateAssayGroupButton<-gbutton ('Update Assay Group', container=Group1, handler=
function (h, ...) {
  UpdateAssayGroup.EAR ()
})
size (UpdateAssayGroupButton) <-c (80, 60)
font (UpdateAssayGroupButton) <-list (size=24,color='Black')
UpdateCyttoxButton<-gbutton ('Update Cytotoxic Value', container=Group1, handler=
function (h, ...) {
  UpdateCyttox.EAR ()
})
size (UpdateCyttoxButton) <-c (80, 60)
font (UpdateCyttoxButton) <-list (size=24,color='Black')

visible (IntroWindow) <-TRUE
}

```

```
#####
```

#####

```

ReadMeFile.EAR<-function() {
#This contains the current notes and changes to the program.
  ReadMeWindow<-gwindow(horizontal = FALSE,"EAR Calculator Readme File", visible=FALSE)
  ReadMeGroup<-ggroup(horizontal = FALSE,container=ReadMeWindow)
    #size(IntroWindow)<-c(784,536)
    AuthorMessage<-'
Written and Tested By Joe Swintek
Additional Testing By Anthony Schroeder, Brett Blackwell, Shubin Li'
  #Update This
  #ChangeMessage<-', container=ReadMeGroup,where='center') #Update This
    #font(WelcomeLab)<-list(size=24)
  AuthorLab<-glabel('Authors', container=ReadMeGroup,where='center')
    font(AuthorLab)<-list(size=16)

  IntroTextframe<-gtext(AuthorMessage,horizontal = FALSE, container=ReadMeGroup,expand
=TRUE,fill=TRUE)
  ChangeLogButton<-gbutton('changes', container=ReadMeGroup,handler= function(h,...){
    ShowChangeLog.EAR()
  })
  ReferenceButton<-gbutton('References', container=ReadMeGroup,handler= function(h,...
){
    Reference.EAR()
  })

  visible(ReadMeWindow)<-TRUE
}
#####
#####

```

```

Reference.EAR<-function() {
#This contain the list of References for the RSCABS Modular

MessageA1<-'-----'
MessageA2<-'----- Package Reference -----'
MessageA3<-'-----'

MessageA4<-"GTK+
http://www.gtk.org/ maintained by the GNOME foundation"

MessageA5<-paste("RGtk2 Package \n", citation('RGtk2')$textVersion, sep='')

MessageA6<-paste("gWidgetsRGtk2 Package \n", citation('gWidgetsRGtk2')$textVersion, sep='')

MessageA7<-paste("cairoDevice Package \n", citation('cairoDevice')$textVersion , sep='')

MessageA8<-paste("abind Package \n", citation('abind')$textVersion, sep='')

```

```
ReferenceMessageA<-paste (MessageA1, '\n\n', MessageA2, '\n\n', MessageA3, '\n\n',
  MessageA4, '\n\n', MessageA5, '\n\n', MessageA6, '\n\n', MessageA7, '\n\n', MessageA8, '\n\n',
  MessageA8, '\n\n')
```

```
MessageB1<-'-----'
MessageB2<-'----- Assay and Chemical Information -----'
MessageB3<-'-----'
```

```
MessageB4<- "Chemical and Assay Information By:
ToxCast: http://www.epa.gov/ncct/toxcast/data.html
"
```

```
MessageB5<- "With additional Chemical Information by:
PubChem: https://pubchem.ncbi.nlm.nih.gov/
"
```

```
ReferenceMessageB<-paste (MessageB1, '\n\n', MessageB2, '\n\n', MessageB3, '\n\n',
  MessageB4, '\n\n', MessageB5, '\n\n')
```

```
ReferenceMessage<-paste (ReferenceMessageA, ReferenceMessageB)
```

```
ReferenceWindow<-gwindow (horizontal = FALSE, "EAR Calculator References", visible=FALSE)
  ReferenceGroup<-gggroup (horizontal = FALSE, container=ReferenceWindow)
    ReferenceLabel<-gtext ( ReferenceMessage, horizontal = FALSE, container=ReferenceGroup,
      expand=TRUE, fill=TRUE)
```

```
size (ReferenceWindow) <-c (600, 420)
visible (ReferenceWindow) <-TRUE
```

```
}
```

```
#####
#####
```

```
ShowChangeLog.EAR<-function() {
```

```
  Changes<- "-----V0.78-----"
```

```
Cytotoxic values
```

```
Flags.EAR Stores the flag ID that have been removed
```

```
Added the ability to filter on Flag ID
```

```
Added sum to multiple selection criteria
```

```
Added Cytotoxic filtering
```

```
Added new assay information loading function
```

```
Added assay grouping function
```

```
-----V0.70-----
```

```
Started Change Log"
```

```
ChangeLogWindow<-gwindow (horizontal = FALSE, "EAR Calculator Change Log", visible=FALSE)
```

```
  ChangeLogGroup<-gggroup (horizontal = FALSE, container=ChangeLogWindow)
```

```
    ChangeLogLabel<-gtext (Changes, horizontal = FALSE, container=ChangeLogGroup, expand=
      TRUE, fill=TRUE)
```

```

size (ChangeLogWindow) <-c (450, 280)
visible (ChangeLogWindow) <-TRUE
}
#####
#####

#####
#####
UpdateAssayGUI.EAR<-function() {
#used to update the Assay information
#Altered to change the new assay format 1-8-2016
pop_message('The Assay File is Large, and is truncated for display')
Sys.sleep(0.5)
TempData.EAR<<-NULL

AssayWindow<-gwindow("Assay Information", visible=FALSE)
  size (AssayWindow) <-c (800, 600)
  MainGroup <- ggroup(horizontal = TRUE, container=AssayWindow)
  ButtonBox<-gframe(horizontal = FALSE, container=MainGroup)
  LoadButton<-gbutton("Load Data", container=ButtonBox, handler= function(h, ...
  ){ #load data button
    temp<-gtkWindow(show=FALSE)
    pop_message('The Assay File is Large, and is truncated for display.\n
    This will take a moment to complete')
    Sys.sleep(0.5)
    open_cb(widget, temp) #Used to just get file name #FileName as global
    pop_message('This may take a while')
    #Load sanitize and merge the new assay information #JS 1-8-2016
    Flags.EAR<<-NULL #Set this to null
    Data<-LoadAssayInformation(FileName)
    TempData.EAR<<-MergeAssayInformation(Data)
    #Freeze GUI while the data set is loading
    while (is.null(TempData.EAR)==TRUE){
    }
    delete(DataBox, DataGrid)
    Disp<-min(dim(TempData.EAR) [1], 100)
    DataGrid<<-gtable(TempData.EAR[1:Disp, ])
    Sys.sleep(0.1)
    add(DataBox, DataGrid, expand=TRUE, fill=TRUE)
    add(ButtonBox, SaveButton)
    SaveAs.EAR<<- 'Assay'

  })
#Use to remove flagged ID's in the Assays
RemovedFlagsButton<-gbutton("Remove Flagged IDs", container=ButtonBox, handler=
function(h, ...) {
  Flags.EAR<<-NULL
  SelectFlags()
  while(is.null(Flags.EAR)){
    Sys.sleep(0.1)

```

```

    }
    if (Flags.EAR==1982) {
      Flags.EAR<<-NULL
    }
    if (is.null(Flags.EAR)==FALSE) {
      TempData.EAR<<-NULL
      TempData.EAR<<-FilterDataFlags (ChemMasterList.EAR, Flags.EAR)
      while (is.null (TempData.EAR)) {
        Sys.sleep (0.1)
      }

      delete (DataBox, DataGrid)
      Disp<-min (dim (TempData.EAR) [1], 100)
      DataGrid<<-gtable (TempData.EAR[1:Disp, ])
      Sys.sleep (0.1)
      add (DataBox, DataGrid, expand=TRUE, fill=TRUE)
      add (ButtonBox, SaveButton)
      SaveAs.EAR<<- 'Flagged'
    }

  })

DataBox<<-gframe ('Current Assay Information', horizontal = FALSE, expand=TRUE,
container=MainGroup) #This box contains the displayed data
Disp<-min (dim (ChemMasterList.EAR) [1], 100)
DataGrid<<-gtable (ChemMasterList.EAR[1:Disp, ])
add (DataBox, DataGrid, expand=TRUE, fill=TRUE)
SaveButton<<-gbutton ("Update EAR Calculator", handler= function (h, ...) { #load data
button
  SaveOldInformation (ChemMasterList.EAR, TempData.EAR, SaveAs.EAR)

})

visible (AssayWindow) <- TRUE
}

#####
#####
UpdateAssayGroup.EAR<-function () {
#used to update the chemical information
#uses Global AssayGroup.EAR

#Convert the Hash Table to an Data set
GroupNames<-sapply (names (AssayGroup.EAR) [-c (1, 2)], function (X) {rep (X, length (AssayGroup.EAR [[X]]))})
Assays<-sapply (names (AssayGroup.EAR) [-c (1, 2)], function (X) {AssayGroup.EAR [[X]]})

AssayGroupData<-data.frame (as.vector (unlist (Assays)), as.vector (unlist (GroupNames)),
stringsAsFactors=FALSE)
colnames (AssayGroupData) <-c ("Assay", "Group")

TempData.EAR<<-NULL
AssayGroupWindow<-gwindow ("Assay Groups", visible=FALSE)

```

```

size(AssayGroupWindow) <- c(800, 600)
MainGroup <- ggroup(horizontal = TRUE, container=AssayGroupWindow)
  ButtonBox <- gframe(horizontal = FALSE, container=MainGroup)
    LoadButton <- gbutton("Load Data", container=ButtonBox, handler= function(h, ...){
      #load data button
      temp <- gtkWindow(show=FALSE)
      TempData.EAR <- open_cb(widget, temp)
      delete(DataBox, DataGrid)
      DataGrid <- gtable(TempData.EAR)
      Sys.sleep(0.1)
      add(DataBox, DataGrid, expand=TRUE, fill=TRUE)
      add(ButtonBox, SaveButton)
    })

DataBox <- gframe('Current Assay Groups', horizontal = FALSE, expand=TRUE, container=
MainGroup) #This box contains the displayed data
  DataGrid <- gtable(AssayGroupData)
  add(DataBox, DataGrid, expand=TRUE, fill=TRUE)
  SaveButton <- gbutton("Update EAR Calculator", handler= function(h, ...){ #load
data button
  SaveOldInformation(AssayGroup.EAR, TempData.EAR, 'AssayGroup')
})

```

```

visible(AssayGroupWindow) <- TRUE

```

```

}

```

```

#####
#####
open_cb <- function(widget, window) {
  #Creates a window to open a file and loads a CVS into R
  #This function is called from all Mods
  dialog <- gtkFileChooserDialog("Choose a CSV file", window, "open",
"gtk-cancel", GtkResponseType["cancel"], "gtk-open",
GtkResponseType["accept"])
  if (dialog$run() == GtkResponseType["accept"]) {
    FileName <- dialog$getFilename()
    if (strsplit(FileName, '.csv') != FileName){
      df <- read.csv(FileName, stringsAsFactors=FALSE, header=TRUE)
    }
    if (strsplit(FileName, '.csv') == FileName){
      df <- data.frame(variables=character(0), stringsAsFactors=FALSE)
      pop_message('Only comma separated value (.csv) files can be loaded')
    }
  }
  dialog$destroy()
  df
}
#####

```



#####

```

SaveOldInformation<-function(OldData,NewData,Name) {
#Prompt user to save the old information
#OldData is the old information data set
#NewData is the Data set that will replace it
#Name is the name of what is being updated either Chemical or Assay
#This function will pop up and display a message to the user
  PopWindow<-gwindow("",width = 240, height= 157,visible=FALSE)
  Textframe<-gggroup(horizontal = FALSE, container=PopWindow,expand=TRUE,fill=TRUE)
  TextMessage<-gtext('Would you like to save the old information as a file?',container
  =Textframe,expand=TRUE,fill=TRUE);
  Yesbutton<-gbutton("Yes",container=Textframe,handler= function(h,...){
    temp<-gtkWindow(show=FALSE)
    save_cb(widget, temp,OldData)
    dispose(PopWindow)
    Sys.sleep(0.25)
    UpdateEARCalculator(NewData,Name)
  })
  Nobutton<-gbutton("No",container=Textframe,handler= function(h,...){
    dispose(PopWindow)
    Sys.sleep(0.25)
    UpdateEARCalculator(NewData,Name)
  })
}

```

```

visible(PopWindow)<-TRUE
}
#####
#####

```

```

UpdateEARCalculator<-function(NewData,Name) {
#Updates the EAR Calculator File
#NewData is the Data set that will replace it
#Name is the name of what is being updated Chemical or Assay

#Set the New Data as the new information data
  if (Name=='Chemical'){
    names(NewData)<-c('chid', "DSSTox_Substance_Id", "DSSTox_Structure_Id",
    "DSSTox_QC.Level", 'Names', "CASNum", "Substance_Type",
    "Substance_Note" , "Structure_SMILES", "Structure_InChI", "Structure_InChIKey",
    "Formula", "Mol")
    ChemInfoList.EAR<<-NewData
  }
  if (Name=='Assay'){
    ChemMasterList.EAR<<-NewData
    pop_message('Flattening the assay file. This may take a minute')
    ChemMasterList.Flat.EAR<<-NULL
    try(ChemMasterListFlat.EAR<<-Melt.EAR(ChemMasterList.EAR, 'Assay.Endpoint', 'CASRN',
    'AC.50'))

    #Freeze gui while the data set is flattening
    while (is.null(ChemMasterListFlat.EAR)==TRUE) {

```

```

    }
    #Update the default assay groups
    DefaultAssayGroups()
  }
  #Added 1-4-2016 to allow for updating
  if (Name=='AssayGroup'){
    #Parse out new groups in the New Data
    NewGroup<-unique(NewData$Group)
    RM<-which( is.element(NewGroup,AssayGroup.EAR$defaultgroups))
    if (length(RM)>0){
      NewGroup<-NewGroup[-RM]
    }
    #Add them to the data set
    for (e in NewGroup){
      AssayGroup.EAR[[e]]<-NewData[NewData$Group==e, ]
    }
    #Update the group list in AssayGroup.EAR
    RM<-which( is.element(NewGroup,AssayGroup.EAR$Groups))
    if (length(RM)>0){
      NewGroup<-NewGroup[-RM]
    }
    AssayGroup.EAR$Groups<-c(AssayGroup.EAR$Groups,NewGroup)
  }
  if (Name=='Cyttox'){
    CanGo<-NULL
    CanGo<-ApplyCyttox(NewData)
    #Pause GUI
    while (is.null(CanGo)==TRUE){
      }
  }
}

if (Name=='Flagged'){
  #Does not update ChemMasterlist
  pop_message('Flattening the assay file. This may take a minute')
  ChemMasterList.Flat.EAR<-NULL
  try(ChemMasterListFlat.EAR<-Melt.EAR(NewData,'Assay.Endpoint','CASRN','AC.50'))

  #Freeze gui while the data set is flattening
  while (is.null(ChemMasterListFlat.EAR)==TRUE){
    }
  #Update the default assay groups
  DefaultAssayGroups()
}

```

```

#This program removes everything from the top level workspace the is not in FunctionList.EAR
RemoveList<-ls(envir = .GlobalEnv)
RemoveNumber<-unlist(sapply(FunctionList.EAR,Which.Apply ,RemoveList))
if (length(RemoveNumber)>0){
  RemoveList<-RemoveList[-RemoveNumber]
}

```

```

}
rm(list=RemoveList,pos= .GlobalEnv,envir = .GlobalEnv)

temp<-gtkWindow(show=FALSE)
SaveWorkSpace(widget, temp);

return()
}

#####
#####

SaveWorkSpace<-function(widget, window) {
#Window to save the output
  dialog <- gtkFileChooserDialog("Enter a name for the file", window,
  "save", "gtk-cancel", GtkResponseType["cancel"], "gtk-save",
  GtkResponseType["accept"])
  if (dialog$run() == GtkResponseType["accept"]){
    File<-paste(dialog$getFilename(), '.RData', sep='');
    save.image(File)
    dialog$destroy()
  }
  dialog$destroy()
}

#####
#####

UpdateChemicalGUI.EAR<-function(){
#used to update the chemical information
#uses Global ChemInfoList.EAR
TempData.EAR<-NULL
  ChemicalWindow<-gwindow("Chemical Information", visible=FALSE)
  size(ChemicalWindow)<-c(800,600)
  MainGroup <- ggroup(horizontal = TRUE,container=ChemicalWindow)
  ButtonBox<-gframe(horizontal = FALSE, container=MainGroup)
  LoadButton<-gbutton("Load Data",container=ButtonBox,handler= function(h,...
  ){ #load data button
    temp<-gtkWindow(show=FALSE)
    TempData.EAR<-open_cb(widget, temp)
    delete(DataBox,DataGrid)
    DataGrid<-gtable(TempData.EAR)
    Sys.sleep(0.1)
    add(DataBox,DataGrid, expand=TRUE,fill=TRUE)

    add(ButtonBox,SaveButton)
  })

  DataBox<-gframe('Current Chemical Information',horizontal = FALSE,expand=TRUE,
  container=MainGroup) #This box contains the displayed data
  DataGrid<-gtable(ChemInfoList.EAR)
  add(DataBox,DataGrid, expand=TRUE,fill=TRUE)
  SaveButton<-gbutton("Update EAR Calculator",handler= function(h,...){ #load

```

```

data button
    SaveOldInformation (ChemInfoList.EAR, TempData.EAR, 'Chemical')

```

```

    })

```

```

visible (ChemicalWindow) <- TRUE

```

```

}

```

```

#####
#####

```

```

UpdateCyttox.EAR <- function() {

```

```

#used to update the chemical information

```

```

#uses Global ChemInfoList.EAR

```

```

TempData.EAR <- NULL

```

```

CyttoxWindow <- gwindow("Cytotoxic Information", visible=FALSE)

```

```

size (CyttoxWindow) <- c (800, 600)

```

```

MainGroup <- ggroup (horizontal = TRUE, container=CyttoxWindow)

```

```

ButtonBox <- gframe (horizontal = FALSE, container=MainGroup)

```

```

LoadButton <- gbutton ("Load Data", container=ButtonBox, handler= function (h, ...
){ #load data button

```

```

temp <- gtkWindow (show=FALSE)

```

```

TempData.EAR <- open_cb (widget, temp)

```

```

delete (DataBox, DataGrid)

```

```

Disp <- min (dim (TempData.EAR) [1], 100)

```

```

DataGrid <- gtable (TempData.EAR [1:Disp, ])

```

```

Sys.sleep (0.1)

```

```

add (DataBox, DataGrid, expand=TRUE, fill=TRUE)

```

```

add (ButtonBox, SaveButton)

```

```

})

```

```

DataBox <- gframe ('Current Cytotoxic Information', horizontal = FALSE, expand=TRUE
, container=MainGroup) #This box contains the displayed data

```

```

Disp <- min (dim (CyttoxInfo.EAR) [1], 100)

```

```

DataGrid <- gtable (CyttoxInfo.EAR [1:Disp, ])

```

```

add (DataBox, DataGrid, expand=TRUE, fill=TRUE)

```

```

SaveButton <- gbutton ("Update EAR Calculator", handler= function (h, ...) { #load
data button

```

```

SaveOldInformation (CyttoxInfo.EAR, TempData.EAR, 'Cyttox')

```

```

})

```

```

visible (CyttoxWindow) <- TRUE

```

```

}

```

```

#####
#####

```

```

StartGUI.EAR <- function() {

```

```

#GUI call for the form for the EAR calculator

```

```

MainWindow.EAR <- gwindow ("Calculate EAR", visible=FALSE)

```

```

size (MainWindow.EAR) <- c (800, 600)

```

```

Maingroup.EAR <- ggroup (horizontal = TRUE)

```

```

add (MainWindow.EAR, Maingroup.EAR, label="Main")

```

```

ButtonBox.EAR<<-gframe (horizontal = FALSE, container=Maingroup.EAR)
  LoadButton<-gbutton ("Load Data", container=ButtonBox.EAR, handler= function (h
, ...) { #load data button
  temp<-gtkWindow (show=FALSE)
  MainData.EAR<<-open_cb.EAR (widget, temp)
  delete (DataBox.EAR, DataGrid.EAR)
  delete (Maingroup.EAR, DataBox.EAR)
  DataBox.EAR<<-gframe (horizontal = FALSE, expand=TRUE)
    add (Maingroup.EAR, DataBox.EAR, expand=TRUE)
    DataGrid.EAR<<-gtable (MainData.EAR)
    add (DataBox.EAR, DataGrid.EAR, expand=TRUE)
  add (ButtonBox.EAR, RunButton.EAR)
  add (ButtonBox.EAR, ExportDataButton.EAR)
})
RunButton.EAR<<-gbutton ("Calculate EAR", handler= function (h, ...) { #Button
to run calculator
  #Check the Data
  CanRun.EAR<<-CheckData.EAR (MainData.EAR)
  if (CanRun.EAR==FALSE) {
    pop_message ("")
  }
  if (CanRun.EAR==TRUE) {
    CleanedData<-ConvertChemData (MainData.EAR)
    pop_message ('The Data has been filtered and converted to
micromolars')
    ShowData.EAR<<-GetShowData.EAR (CleanedData$SiteData, CleanedData$
ChemData, CleanedData$CasRN)

    delete (DataBox.EAR, DataGrid.EAR)
    Results.EAR<<-CalculatedAllEAR (CleanedData, FALSE)
    ResultsCyttox.EAR<<-CalculatedAllEAR (CleanedData, TRUE)

    Sys.sleep (0.1) #need to pause
    DataGrid.EAR<<-gtable (ShowData.EAR)
    add (DataBox.EAR, DataGrid.EAR, expand=TRUE)
    add (ButtonBox.EAR, OpenReulstsButton.EAR)
    add (ButtonBox.EAR, ExportUnderTestButton.EAR)

  }
})
#added 12-24-2015; Exports the cleaned data set
ExportDataButton.EAR<<-gbutton ("Export Data", handler= function (h, ...) {
#Button to run calculator
  #Calculate cleaned data
  CleanedData<-ConvertChemData (MainData.EAR)
  OutData<-cbind (CleanedData$SiteData, CleanedData$ChemData)
  #Save Data
  stemp<-gtkWindow (show=FALSE)
  save_cb (widget, stemp, OutData)
})
#added 1-6-2016; Exports the values lower then the lowest test concentration
ExportUnderTestButton.EAR<<-gbutton ("Under Lowest Tested", handler= function (

```

```

h,...){ #Button to run calculator
  #Identify Data
  UnderTest<-ChemMasterList.EAR[which(ChemMasterList.EAR$UnderTest==
    TRUE), ]
  #Save Data
  stemp<-gtkWindow(show=FALSE)
  save_cb(widget, stemp,UnderTest)
})

OpenReulstsButton.EAR<-gbutton("View EAR",handler= function(h,...){
  #Button to run calculator
  PlotViewerGUI.EAR(Results.EAR)
})

DataBox.EAR<-gframe(horizontal = FALSE, label='Histopath Main',expand=TRUE)
#This box contains the displayed data
add(Maingroup.EAR,DataBox.EAR, expand=TRUE)
blankDF = data.frame(variables=character(0), stringsAsFactors=FALSE)
DataGrid.EAR<-gtable(blankDF, expand=TRUE )
add(DataBox.EAR,DataGrid.EAR)

visible(MainWindow.EAR)<-TRUE
}
#####
#####

open_cb.EAR <- function(widget, window) {
  #Creates a window to open a file and loads a CVS into R
  #This function is called from all Mods
  dialog <- gtkFileChooserDialog("Choose a CSV file", window, "open",
    "gtk-cancel", GtkResponseType["cancel"], "gtk-open",
    GtkResponseType["accept"])
  if (dialog$run() == GtkResponseType["accept"]) {
    FileName<-dialog$getFilename()
    if (strsplit(FileName, '.csv') != FileName){
      df <- read.csv(FileName,header=FALSE,stringsAsFactors=FALSE)
    }
    if (strsplit(FileName, '.csv') == FileName){
      df <- data.frame(variables=character(0), stringsAsFactors=FALSE)
      pop_message('Only comma separated value (.csv) files can be loaded')
    }
  }
  dialog$destroy()
  df
}
#####
#####

CheckData.EAR<-function(Data) {
  #Function check the data for compatibility
  return(TRUE)
}
#####

```

#####

```

GetShowData.EAR<-function(SiteData, ChemData, CAS) {
#Function that combines the Data set for display
#Site data is Site Data from a a .EAR data set
#Chem data is Chemistry Data from a a .EAR data set
#CAS data are CAS numbers to go with the chemicals
  options(warn=-1) #Turn off known warning
  #Convert to micro-molars
  NameCas<-cbind(CAS, CAS)
  MW<-apply(NameCas, 1, GetMW, 'CAS')
  ChemDataMW<-rbind(MW, ChemData)
  ChemDataMW<-apply(ChemDataMW, 2, Convert2uM, "ug/L")

  #Square off Site Data
  SiteData<-rbind('CAS', 'MW', SiteData)
  NAS1<-which(is.na(SiteData[1, ])==TRUE)
  NAS2<-which(is.na(SiteData[2, ])==TRUE)
  if (length(NAS1)>0) {
    SiteData[1, NAS1]='CAS'
  }
  if (length(NAS2)>0) {
    SiteData[2, NAS2]='MW'
  }
  ChemData<-rbind(CAS, ChemDataMW)
  options(warn=-1)
return(cbind(SiteData, ChemData))
}

```

#####

```

PlotViewerGUI.EAR<-function(ResultsEAR) {
#This is a GUI function that is used to View EAR Results

#Parameters
  MRange=max(dim(ResultsEAR$EARCube))
  Replot.EAR<<-FALSE

```

#Main Window

```

PlotWindow<-gwindow("Calculated EAR", visible=FALSE)
size(PlotWindow)<-c(1000, 640) #Length, Height

Maingroup <- ggroup(horizontal = TRUE, container=PlotWindow, expand=TRUE)
  #Frame containing the controls for Graph
  ControlBox<-gframe(horizontal = FALSE, container=Maingroup)
  SelectSiteButton<-gbutton('Select Site', fill=TRUE, container=ControlBox, handler=
function(h, ...) {
  GetSitesWindowPop(ResultsEAR)
})
  SelectSiteFrame<-gframe('Selected Site', horizontal = FALSE, container=
ControlBox)
  SelectSiteLabel.EAR<<-glabel('All', horizontal = FALSE, container=

```

```

SelectSiteFrame)
  if (length(SitesList.EAR)>1){
    svalue(SelectSiteLabel.EAR)<<-'Small List'
  }else{
    svalue(SelectSiteLabel.EAR)<<-SitesList.EAR
  }
SelectChemicalButton<-gbutton('Select Chemicals',fill=TRUE,container=ControlBox,
handler= function(h,...){
  GetChemicalsWindowPop(ResultsEAR)
})
SelectChemicalFrame<-gframe('Selected Chemical',horizontal = FALSE,container
=ControlBox)
  SelectChemicalLabel.EAR<<-glabel('All',horizontal = FALSE,container=
SelectChemicalFrame)
  if (length(ChemicalsList.EAR)>1){
    svalue(SelectChemicalLabel.EAR)<<-'Small List'
  }else{
    svalue(SelectChemicalLabel.EAR)<<-ChemicalsList.EAR
  }
SelectAssayButton<-gbutton('Select Assays',fill=TRUE,container=ControlBox,
handler= function(h,...){
  GetAssayTypeWindowPop(ResultsEAR)
})
SelectAssayFrame<-gframe('Selected Assay',horizontal = FALSE,container=
ControlBox)
  SelectAssayLabel.EAR<<-glabel('All',horizontal = FALSE,container=
SelectAssayFrame)
  if (length(AssayList.EAR)>1){
    svalue(SelectAssayLabel.EAR)<<-'Small List'
  }else{
    svalue(SelectAssayLabel.EAR)<<-AssayList.EAR
  }
GroupSelectFrame<-gframe('Criteria For Multiple Selection',horizontal = FALSE,
container=ControlBox)
  GroupSelectCBox.EAR<<-gcombobox(c('Ignore','Site - Largest','Site -
Smallest','Site - Sum',
                                     'Chemical - Largest','Chemical -
Smallest','Chemical - Sum',
                                     'Assay - Largest','Assay - Smallest'
                                     , 'Assay - Sum'),
    selected = 1,editable = FALSE,container=GroupSelectFrame)

XRangeFrame<-gframe('First and Last Element of X-Axis',container=ControlBox)
  XMinSelectionCbox.EAR<<-gcombobox(1:MRange,selected = 1,container=
XRangeFrame,editable = TRUE)
  size(XMinSelectionCbox.EAR)<-c(100,20)
  XMaxSelectionCbox.EAR<<-gcombobox(2:MRange,selected = 99,container=
XRangeFrame,editable = TRUE)
  size(XMaxSelectionCbox.EAR)<-c(100,20)
YRangeFrame<-gframe('First and Last Element of Y-Axis',container=ControlBox)
  YMinSelectionCbox.EAR<<-gcombobox(1:MRange,selected = 1,container=
YRangeFrame,editable = TRUE)
  size(YMinSelectionCbox.EAR)<-c(100,20)

```



```

YMaxSelectionCbox.EAR<<-gcombobox (2:MRange, selected = 59, container=
YRangeFrame, editable = TRUE)
  size(YMaxSelectionCbox.EAR) <-c (100, 20)
SCritFrame<-gframe ('Sorting Criteria', container=ControlBox)
  SCritSelectionCbox.EAR<<-gcombobox (SortList.EAR, selected = 1, container=
  SCritFrame, editable = FALSE, expand=TRUE)
ThresholdFrame<-gframe ('Plotting Threshold', container=ControlBox)
  #Changed 12-24-2015 to account for changes in how categories are defined
  ThresholdSelectionCbox.EAR<<-gcombobox (c (NA, 0.01, 0.1, 0.3, 0.5, 1, 2, 5, 10, 100),
  selected = 1, container=ThresholdFrame, editable = TRUE, expand=TRUE)
SwitchAxisFrame<-gframe ('Switch Axes?', container=ControlBox)
  SwitchAxisCbox.EAR<<-gcombobox (c (FALSE, TRUE), selected = 1, container=
  SwitchAxisFrame, editable = FALSE, expand=TRUE)
DetectionLimitFrame<-gframe ('Under Detection Limit', container=ControlBox)
  DetectionLimitCbox.EAR<<-gcombobox (c ('Nothing', 'Circle', 'Zero Out'), selected
  = 1, container=DetectionLimitFrame, editable = FALSE, expand=TRUE)
CyttoxFrame<-gframe ('Compensate for Cytotoxic Values', container=ControlBox)
  CyttoxCbox.EAR<<-gcombobox (c (TRUE, FALSE), selected = 1, container=CyttoxFrame,
  editable = FALSE, expand=TRUE)

#Added
DefineCatFrame<-gframe ('Define Categories', horizontal = FALSE, container=
ControlBox)
  DefineCatButton<-gbutton ('Select Categories', expand=TRUE, container=
  DefineCatFrame, handler= function (h, ...) {
    DefineCategory () })
  ColorGroup<-gggroup (horizontal = TRUE, expand=TRUE, container=DefineCatFrame)
    BlueLabFrame<-gframe ('Blue', container=ColorGroup)
      BlueLable.EAR<<-glabel ('0.1', container=BlueLabFrame)
    GreenLabFrame<-gframe ('Green', container=ColorGroup)
      GreenLable.EAR<<-glabel ('1', container=GreenLabFrame)
    RedLabFrame<-gframe ('Red', container=ColorGroup)
      RedLable.EAR<<-glabel ('10', container=RedLabFrame)

UpdateGraphButton<-gbutton ('Plot Selection', expand=TRUE, container=ControlBox,
handler= function (h, ...) {
  #Apply Cyttox
  if (svalue (CyttoxCbox.EAR) ==TRUE) {
    Results.EAR<-ResultsCyttox.EAR
  }

#plotting Ranges
  XMin<-as.numeric (svalue (XMinSelectionCbox.EAR))
  XMax<-as.numeric (svalue (XMaxSelectionCbox.EAR))
  YMin<-as.numeric (svalue (YMinSelectionCbox.EAR))
  YMax<-as.numeric (svalue (YMaxSelectionCbox.EAR))

#Sorting criteria
  SCrit<-svalue (SCritSelectionCbox.EAR)

#Check if plot can be made
  MCrit<-svalue (GroupSelectCBox.EAR)
  MakePlot<-CheckPlot (XMin, XMax, YMin, YMax, SCrit, MCrit)

```

```

SwitchAxis<-!as.logical(svalue(SwitchAxisCbox.EAR))
if (MakePlot==TRUE) {
  Threshold=as.numeric(svalue(ThresholdSelectionCbox.EAR))
  NonDetect<-svalue(DetectionLimitCbox.EAR)

  Sys.sleep(0.1)
  MainPlotEARAll(ResultsEAR, NULL, SitesList.EAR, ChemicalsList.EAR,
  AssayList.EAR, SwitchAxis,
    SCrit, Replot.EAR, Threshold, XMin, XMax, YMin, YMax, 'GUI', NonDetect,
    MCrit)
  Replot.EAR<<-TRUE
}
})
SaveGraphButton<-gbutton('Save Plot', expand=TRUE, container=ControlBox, handler=
function(h, ...) {
  #Apply Cyttox
  if (svalue(CyttoxCbox.EAR)==TRUE) {
    Results.EAR<-ResultsCyttox.EAR
  }
  #plotting Ranges
  XMin<-as.numeric(svalue(XMinSelectionCbox.EAR))
  XMax<-as.numeric(svalue(XMaxSelectionCbox.EAR))
  YMin<-as.numeric(svalue(YMinSelectionCbox.EAR))
  YMax<-as.numeric(svalue(YMaxSelectionCbox.EAR))
  #Sorting criteria
  SCrit<-svalue(SCritSelectionCbox.EAR)
  #Check if plot can be made
  MCrit<-svalue(GroupSelectCBox.EAR)
  MakePlot<-CheckPlot(XMin, XMax, YMin, YMax, SCrit, MCrit)

  if (MakePlot==TRUE) {
    Threshold=as.numeric(svalue(ThresholdSelectionCbox.EAR))
    SwitchAxis<-!as.logical(svalue(SwitchAxisCbox.EAR))
    NonDetect<-svalue(DetectionLimitCbox.EAR)

    Sys.sleep(0.1)
    stemp<-gtkWindow(show=FALSE)
    File.Out<-GetFileName(widget, stemp)
    if (is.null(File.Out)==FALSE) {
      MainPlotEARAll(ResultsEAR, File.Out, SitesList.EAR,
      ChemicalsList.EAR, AssayList.EAR, SwitchAxis,
        SCrit, 'FALSE', Threshold, XMin, XMax, YMin, YMax, 'PDF', NonDetect,
        MCrit)
    }
  }
}
})
SaveEARButton<-gbutton('Save EARs', expand=TRUE, container=ControlBox, handler=
function(h, ...) {
  #Apply Cyttox
  if (svalue(CyttoxCbox.EAR)==TRUE) {
    Results.EAR<-ResultsCyttox.EAR
  }
}

```

```

#Check data
XMin<-as.numeric(svalue(XMinSelectionCbox.EAR))
XMax<-as.numeric(svalue(XMaxSelectionCbox.EAR))
YMin<-as.numeric(svalue(YMinSelectionCbox.EAR))
YMax<-as.numeric(svalue(YMaxSelectionCbox.EAR))
SCrit<-svalue(SCritSelectionCbox.EAR)
MCrit<-svalue(GroupSelectCBox.EAR)
MakePlot<-CheckPlot(XMin,XMax,YMin,YMax,SCrit,MCrit)

if (MakePlot==TRUE){
#Filter Data
  Threshold=as.numeric(svalue(ThresholdSelectionCbox.EAR))
  NonDetect<-svalue(DetectionLimitCbox.EAR)
#Apply the under limit
  BoolUnderLimit<-{NonDetect == 'Zero Out'}
  ResultsEAR<-ApplyUnderLimit(Results.EAR,BoolUnderLimit)

#Add the sum of EARs of chemicals over all Assays
  if ({ChemicalsList.EAR=='All' || length(which(ChemicalsList.EAR=='
  'Sum'))>0}){
    ResultsEAR<-SumOverAllAssays(ResultsEAR)
  }
#Filter the data
  FilteredData<-FilterEARDataAll(ResultsEAR,SitesList.EAR,
  ChemicalsList.EAR,AssayList.EAR,Threshold,NonDetect,MCrit)
#Sort on EAR
  SortedData<-SortDataAll(FilteredData,SCrit=SCrit)
#Prep the data
  SwitchAxis<-!as.logical(svalue(SwitchAxisCbox.EAR))
  PrepData<-PrepEARSave(SortedData,SwitchAxis)

#Save the Data
  stemp<-gtkWindow(show=FALSE)
  save_cb(widget, stemp,PrepData)
  Sys.sleep(0.1) #need to pause
  pop_message('Data Saved')
}
})
#Added 1-6-2016
ExportTheshButton<-gbutton('Export Above Threshold',expand=TRUE,container=
ControlBox,handler= function(h,...){
  #Apply Cytos
  if (svalue(CytosCbox.EAR)==TRUE){
    Results.EAR<-ResultsCytos.EAR
  }

#Gather information from GUI
  Threshold=as.numeric(svalue(ThresholdSelectionCbox.EAR))
  NonDetect<-svalue(DetectionLimitCbox.EAR)
  BoolUnderLimit<-{NonDetect == 'Zero Out'}
#Apply under limit

```

```

ResultsEAR<-ApplyUnderLimit (Results.EAR, BoolUnderLimit)
ResultsEAR<-SumOverAllAssays (ResultsEAR)
#Find the values above the threshold
Outdata<-AboveThreshold(Threshold, ResultsEAR)
#Write the results to disk
stemp<-gtkWindow(show=FALSE)
save_cb(widget, stemp, Outdata)
Sys.sleep(0.1) #need to pause
pop_message('Data Saved')
})

#size(UpdateGraphButton)<-c(200,40)
#Frame Containing the Graph
GraphBox<-gframe(horizontal = FALSE, container=Maingroup, fill=TRUE, expand=TRUE)
Graphs<-ggraphics(container=GraphBox, fill=TRUE, expand=TRUE)

visible(PlotWindow)<-TRUE
}

#####
#####
GetSitesWindowPop<-function(ResultsEAR) {
#Creates a pop up window were the user can select sites to be plotted
Variables<-rbind('All', ResultsEAR$SiteData[,1:5])

SitesSelectWindow<-gwindow("Please select Site(s)", visible=FALSE)
group <- ggroup(horizontal = FALSE, container=SitesSelectWindow, spacing = 20)
Subsetselect<- gtable(Variables, container=group, expand=TRUE, multiple = TRUE)
SelectButton <- gbutton("Select", container=group, handler= function(h,...)
{SiteList<-svalue(Subsetselect, index=TRUE);
#Filter Site List for results
if (length(which(SiteList==1))>0){ # if all is in the site list just use all
SitesList.EAR<-'All'
}else{
SitesList.EAR<-ResultsEAR$SiteData[['SAMPLE RECORD NUMBER']][SiteList-1]
}
#Update GUI
if(length(SitesList.EAR)>1){
svalue(SelectSiteLabel.EAR)<-'Small List'
}else{
svalue(SelectSiteLabel.EAR)<-SitesList.EAR
}
dispose(SitesSelectWindow)})
visible(SitesSelectWindow)<-TRUE
}
#####
#####

```

```

GetChemicalsWindowPop<-function(ResultsEAR) {
#Creates a pop up window were the user can select Chemicals to be plotted

  colnames(ResultsEAR$ChemicalNames)<-c('Chemical','CAS')
  Varaibles<-ResultsEAR$ChemicalNames
  Varaibles<-rbind('All','Sum',Varaibles)

  SitesSelectWindow<-gwindow("Please select Chemical(s)", visible=FALSE)
  group <- ggroup(horizontal = FALSE, container=SitesSelectWindow,spacing = 20)

  Subsetselect<- gtable(Varaibles,container=group, expand=TRUE, multiple = TRUE)
  SelectButton <- gbutton("Select",container=group,handler= function(h,...){
  ChemicalsList<-svalue(Subsetselect,index=TRUE);
  ChemicalsList.EAR<<-Varaibles[ChemicalsList,2]
  #Filter Site List for results
  if (length(which(ChemicalsList.EAR=='All'))>0){ # if all is in the site list
  just use all
  ChemicalsList.EAR<<-'All'
  }
  #Update GUI
  if(length(ChemicalsList.EAR)>1){
  svalue(SelectChemicalLabel.EAR)<<-'Small List'
  }else{
  svalue(SelectChemicalLabel.EAR)<<-ChemicalsList.EAR
  }
  dispose(SitesSelectWindow)
  })
  visible(SitesSelectWindow)<-TRUE
}
#####
#####

GetAssayTypeWindowPop<-function(ResultsEAR) {
#Creates a pop up window were the user can select how to select the assays

  AssayTypeSelectWindow<-gwindow("Please select one",,width = 240, height= 157, visible=FALSE)
  group <- ggroup(horizontal = FALSE, container=AssayTypeSelectWindow,spacing = 5,fill=
  TRUE,extend=TRUE)

  AssayButton <- gbutton("Select Individual Assays",container=group,fill=TRUE,extend=TRUE,
  handler= function(h,...){
  GetAssayWindowPop(ResultsEAR)
  dispose(AssayTypeSelectWindow)
  })
  font(AssayButton)<-list(size=24,color='black')
  AssayGroupButton <- gbutton("Select Assays by Group",container=group,fill=TRUE,extend=
  TRUE,handler= function(h,...){
  GetAssayGroupWindowPop()
  dispose(AssayTypeSelectWindow)
  })
  font(AssayGroupButton)<-list(size=24,color='black')
  visible(AssayTypeSelectWindow)<-TRUE
}

```

```
#####
#####
```

```
GetAssayWindowPop<-function(ResultsEAR) {
#Creates a pop up window were the user can select Chemicals to be plotted
  Variables<-rownames(ResultsEAR$AC50s)
  Variables<-c('All',Variables)

  SitesSelectWindow<-gwindow("Please select Assay(s)", visible=FALSE)
  group <- ggroup(horizontal = FALSE, container=SitesSelectWindow,spacing = 20)

  Subsetselect<- gtable(Variables,container=group, expand=TRUE, multiple = TRUE)
  SelectButton <- gbutton("Select",container=group,handler= function(h,...){
  AssayList<-svalue(Subsetselect,index=TRUE);
  AssayList.EAR<<-Variables[AssayList]
  #Filter Site List for results
  if (length(which(AssayList.EAR=='All'))>0){ # if all is in the site list just
  use all
  AssayList.EAR<<-'All'
  }
  #Update GUI
  if(length(AssayList.EAR)>1){
  svalue(SelectAssayLabel.EAR)<<-'Small List'
  }else{
  svalue(SelectAssayLabel.EAR)<<-AssayList.EAR
  }
  dispose(SitesSelectWindow)
  })
  visible(SitesSelectWindow)<-TRUE
}
#####
#####
```

```
GetAssayGroupWindowPop<-function() {
#Creates a pop up window were the user can select assays to be plotted *by group*
#Uses global AssayGroup.EAR

#Get selections
  Variables<-AssayGroup.EAR$Groups

  AssaySelectWindow<-gwindow("Please select Assay(s)", visible=FALSE)
  group <- ggroup(horizontal = FALSE, container=AssaySelectWindow,spacing = 20)

  Subsetselect <- gtable(Variables,container=group, expand=TRUE, multiple = TRUE)
  SelectButton <- gbutton("Select",container=group,handler= function(h,...){
  GroupList <-svalue(Subsetselect,index=TRUE);

  #Apply user selected list
  OutList<-as.vector(unlist(sapply(GroupList,function(X){return(AssayGroup.EAR[[
  AssayGroup.EAR$Groups[X]]]})))
  AssayList.EAR<<-OutList
  #Update GUI
```

```

    if (length (GroupList) > 1) {
      svalue (SelectAssayLabel.EAR) <<- 'Small List'
    } else {
      svalue (SelectAssayLabel.EAR) <<- AssayGroup.EAR$Groups [GroupList]
    }
    dispose (AssaySelectWindow)
  })

```

```

visible (AssaySelectWindow) <- TRUE
}

```

```

#####
#####

```

```

CheckPlot <- function (XMin, XMax, YMin, YMax, SCrit, MCrit) {

```

```

#Function that checks the input parameters for a plot and warn the user if conditions are not met

```

```

  Message <- NULL #Message for user
  Check <- TRUE #Bool, used as output

```

```

  MSite <- FALSE
  MChemical <- FALSE
  MAssay <- FALSE

```

```

  if (SitesList.EAR == 'All' || length (SitesList.EAR) > 1) {
    MSite <- TRUE
    if (MCrit == 'Site - Largest' || MCrit == 'Site - Smallest' || MCrit == 'Site - Sum') {
      MSite <- FALSE
    }
  }

```

```

  if (ChemicalsList.EAR == 'All' || length (ChemicalsList.EAR) > 1) {
    MChemical <- TRUE
    if (MCrit == 'Chemical - Largest' || MCrit == 'Chemical - Smallest' || MCrit == 'Chemical - Sum') {
      MChemical <- FALSE
    }
  }

```

```

  if (AssayList.EAR == 'All' || length (AssayList.EAR) > 1) {
    MAssay <- TRUE
    if (MCrit == 'Assay - Largest' || MCrit == 'Assay - Smallest' || MCrit == 'Assay - Sum') {
      MAssay <- FALSE
    }
  }

```

```

  if (MAssay == TRUE && MChemical == TRUE && MSite == TRUE) {
    Check <- FALSE
  }

```

```

  if (Check == FALSE) {
    Message <- paste (Message, 'Only one Site, or one Chemical or one Assay must be selected\n')
  }

```

```
if ((XMax-XMin)>99){
# Check<-FALSE
# Message<-paste(Message,'The X-Axis can only have up to 100 different values please
lessen your range\n')
  Message<-paste(Message,'Warning! The X-Axis can only handle up to 100 different values
  please lessen your range\n')
}
if ((XMax-XMin)<1){
  Check<-FALSE
  Message<-paste(Message,'The maximum value for X must be more than the minimum\n')
}
if ((YMax-YMin)>60){
# Check<-FALSE
# Message<-paste(Message,'The Y-Axis can only have up to 60 different values please
lessen your range\n')
  Message<-paste(Message,'Warning! The Y-Axis can only handle up to 60 different values
  please lessen your range\n')
}
if ((YMax-YMin)<1){
  Check<-FALSE
  Message<-paste(Message,'The maximum value for Y must be more than the minimum\n')
}
if (XMin<0){
  Check<-FALSE
  Message<-paste(Message,'The minimum value for X must be more than 0\n')
}
if (XMax<0){
  Check<-FALSE
  Message<-paste(Message,'The maximum value for X must be more than 0\n')
}
if (YMin<0){
  Check<-FALSE
  Message<-paste(Message,'The minimum value for Y must be more than 0\n')
}
if (YMax<0){
  Check<-FALSE
  Message<-paste(Message,'The maximum value for Y must be more than 0\n')
}
if (floor(XMin) !=XMin){
  Check<-FALSE
  Message<-paste(Message,'The minimum value for X must be an integer \n')
}
if (floor(XMax) !=XMax){
  Check<-FALSE
  Message<-paste(Message,'The maximum value for X must be an integer \n')
}
if (floor(YMin) !=YMin){
  Check<-FALSE
  Message<-paste(Message,'The minimum value for Y must be an integer \n')
}
if (floor(YMax) !=YMax){
  Check<-FALSE
  Message<-paste(Message,'The maximum value for Y must be an integer \n')
```



```

}
if (length(which(SortList.EAR==SCrit)) == 0){
  Check<-FALSE
  Message<-paste(Message, 'Please select a sorting criteria from the list \n')
}
if (is.null(Message)==FALSE){
  pop_message(Message)
}
return(Check)
}
#####
#####

GetFileName<- function(widget, window) {
  #Window to save the output
  FileOut<-NULL
  dialog <- gtkFileChooserDialog("Enter a name for the file", window,
  "save", "gtk-cancel", GtkResponseType["cancel"], "gtk-save",
  GtkResponseType["accept"])
  if (dialog$run() == GtkResponseType["accept"]){
    FileOut=dialog$getFilename()
  }
  dialog$destroy()
return(FileOut)
}
#####
#####

save_cb <- function(widget, window, OutData) {
  #Window to save the output
  dialog <- gtkFileChooserDialog("Enter a name for the file", window,
  "save", "gtk-cancel", GtkResponseType["cancel"], "gtk-save",
  GtkResponseType["accept"])
  if (dialog$run() == GtkResponseType["accept"]){
    save_file(dialog$getFilename(), OutData)
  }
  dialog$destroy()
}

#####
#####

save_file<-function(File, OutData){
#Saves the output
  write.table(OutData, paste(File, '.csv', sep=''), row.names=FALSE, sep=',')
}
#####
#####

pop_message<-function(Message) {
  #This function will pop up and display a message to the user
  PopWindow<-gwindow("Alert!", width = 240, height= 157, visible=FALSE)
  Textframe<-gggroup(horizontal = FALSE, container=PopWindow, expand=TRUE, fill=TRUE)

```

```

    TextMessage<-gtext (Message,container=Textframe,expand=TRUE,fill=TRUE);
    Okbutton<-gbutton("OK",container=Textframe,handler= function(h,...){
        dispose(PopWindow)
    })
    visible(PopWindow)<-TRUE
}
#####
#####

PrepEARSave<-function(Data,SwitchAxis){
#Preparea EAR Data to be saved to a CSV
#Data is an EAR calculated File, already filtered and sorted
YAxis<-Data$ColName
if (YAxis=='Chemical'){
    YLabels<-Data$ChemicalNames[ ,1]
    DimGraphY<-length(YLabels)
}
if (YAxis=='Assay'){
    YLabels<-rownames(Data$AC50s)
    if (Data$TitleName=='Chemical'){
        YLabels<-names(Data$AC50s)
    }
    DimGraphY<-length(YLabels)
}
if (YAxis=='Site'){
    SiteData<-Data$SiteData
    FieldNames<-Data[['FIELD NAME']]
    Dates<-Data[['DATE COLLECTED']]
    Times<-Data[['TIME COLLECTED']]

    DimGraphY<-dim(SiteData)[1]
}
#Get X-axis (Column of EARCube)
XAxis<-Data$RowName
if (XAxis=='Chemical'){
    XLabels<-Data$ChemicalNames[ ,1]
    DimGraphX<-length(XLabels)
}
if (XAxis=='Assay'){
    XLabels<-rownames(Data$AC50s)
    DimGraphX<-length(XLabels)
}
if (XAxis=='Site'){
    SiteData<-Data$SiteData
    FieldNames<-SiteData[['FIELD NAME']]
    Dates<-SiteData[['DATE COLLECTED']]
    Times<-SiteData[['TIME COLLECTED']]
    XLabels<-paste(FieldNames,Dates,Times)
    DimGraphX<-dim(SiteData)[1]
}
#Switch Axes if need be

```

```

if (SwitchAxis==TRUE) {
  TAxis<-XAxis
  TLabels<-XLabels
  DimGraphT<-DimGraphX
  XAxis<-YAxis
  XLabels<-YLabels
  DimGraphX<-DimGraphY
  YAxis<-TAxis
  YLabels<-TLabels
  DimGraphY<-DimGraphT
  Data$EARCube<-t (Data$EARCube)
}

#Prep data to be displaced
DataOut<-t (Data$EARCube)
colnames (DataOut) <-XLabels
DataOut<-cbind (YLabels,DataOut)
colnames (DataOut) [1]<-YAxis
return (DataOut)
}

#####
#####

DefineCategory<-function() {
#Calls a window where users can set the plotting categories
#Modifies global PlottingCat.EAR
#Modifies global BlueLable.EAR, GreenLable.EAR, RedLable.EAR

DefineCategoryWindow<-gwindow ("Plotting Categories", visible=FALSE)
  Group <- ggroup (horizontal = FALSE, container=DefineCategoryWindow, spacing = 20)
  #Select plotting categories
  DCBlueFrame<-gframe ('Blue Category', container=Group, expand=FALSE, fill=FALSE)
  DCBlueCbox<-gcombobox (c (0.01, 0.1, 0.5, 1, 2, 5, 10, 20), selected = 2, container=
  DCBlueFrame,
    editable = TRUE, expand=TRUE, fill=TRUE)
  DCGreenFrame<-gframe ('Green Category', container=Group, expand=FALSE, fill=FALSE)
  DCGreenCbox<-gcombobox (c (0.01, 0.1, 0.5, 1, 2, 5, 10, 20), selected = 4, container=
  DCGreenFrame,
    editable = TRUE, expand=TRUE, fill=TRUE)
  DCRedFrame<-gframe ('Red Category', container=Group, expand=FALSE, fill=FALSE)
  DCRedCbox<-gcombobox (c (0.01, 0.1, 0.5, 1, 2, 5, 10, 20), selected = 7, container=
  DCRedFrame,
    editable = TRUE, expand=TRUE, fill=TRUE)
  #Confirm Selection
  ConfirmButton <- gbutton ("Select", container=Group, expand=FALSE, fill=TRUE, handler
  = function (h, ...) {
    PlottingCat.EAR [1]<<-as.numeric (svalue (DCBlueCbox))
    PlottingCat.EAR [2]<<-as.numeric (svalue (DCGreenCbox))
    PlottingCat.EAR [3]<<-as.numeric (svalue (DCRedCbox))
    svalue (BlueLable.EAR) <<-as.numeric (svalue (DCBlueCbox))
    svalue (GreenLable.EAR) <<-as.numeric (svalue (DCGreenCbox))
    svalue (RedLable.EAR) <<-as.numeric (svalue (DCRedCbox))
    #Kill the window
    dispose (DefineCategoryWindow)
  }
}

```

```
  })
```

```
visible(DefineCategoryWindow) <- TRUE
}
```

```
SelectFlags <- function() {
#selects flags ID (By number)
  Window <- gwindow("Flag IDs to remove.", visible=FALSE)
  size(Window) <- c(100, 100)
  group <- ggroup(horizontal = FALSE, container=Window, spacing = -10)
  Frame <- gframe(container=group, expand=TRUE, fill=TRUE)
  Message <- glabel("Please type in each flag ID to remove separated by a \",\"",
    container=Frame, editable = FALSE, expand=TRUE, fill=TRUE)
  Input <- gedit('7,15,17', container=group, editable = TRUE, expand=TRUE, fill=TRUE)

  SelectButton <- gbutton("Select", container=group, handler= function(h, ...){
    Flags <- svalue(Input)
    Flags <- as.numeric(strsplit(Flags, ',')[[1]])
    MessageOut <- paste0("The flag ID of: \n", Flags[1])
    if (length(Flags) > 1){
      for (i in 2:length(Flags)){
        MessageOut <- paste0(MessageOut, "\n", Flags[i])
      }
    }
    MessageOut <- paste0(MessageOut, "\n", 'will be removed!\n This may take a minute!')
    pop_message(MessageOut)
    Flags.EAR <- Flags
    dispose(Window)
  })
  visible(Window) <- TRUE

  addHandlerUnrealize(Window, handler = function(h, ...) {
    val <- gconfirm("Forgo removing flagged data", parent=h$obj)
    if(as.logical(val)){
      Flags.EAR <- -1982 #is the null value for flags
      return(FALSE) # destroy
    }else{
      return(TRUE) # don't destroy
    }
  })
}
```

```
#####
#####
#####
#####
##                               Plotting
Functions                         ##
#####
#####
```

```
#####  
#####  
#This file contains all the functions used in plotting EAR values  
#This is the back end to the that handles plotting  
  
#####  
#####  
#  
Global #  
#####  
#####  
#Global values used in the calculation algorithms  
  
#Warnings.EAR  
#List data structure [[1]] contains it's length will each element is a warning to the user  
#ChemMasterList.EAR  
#Data Set containing assays for all the chemical  
#ChemMasterListFlat.EAR  
#Data Set containing assays for all the chemical flattened into a matrix of chemical by  
assay  
#ChemInfoList.EAR  
#A data set containing the Names, CAS numbers, molecular weights, and Formulas of the  
chemicals  
#PlottingCat.EAR  
#Global Vector that stores the values for the plotting categories  
#4 Categories 1: dot, 2: blue, 3:green, 4:red (  
#3 numbers indicating the upper bound of each category  
  
#####  
#####  
# Function  
List #  
#####  
#####  
  
#MainPlotEARAll  
#ApplyUnderLimit  
#SumOverAllAssays  
#FilterEARDataAll  
#Which.Apply  
#CollapseData  
#WhichOverMinMax  
#GetValueOverCube  
#GetIndexVec  
#GetIndexVec  
#SortDataAll  
#CalcChemWiegght  
#PlotEARAll  
#ApplyCharLimit  
#UnderToWhite  
#GetpchPDF
```

```

#GetpchGUI
#Getcol
#GetLocation
#SavePlotEARAll
#PlotEARAll
  #ApplyCharLimit
  #UnderToWhite
  #GetpchPDF
  #GetpchGUI
  #Getcol
  #GetLocation

```

```

#####
#####
#
#                               Function                               #
Information                               #
#####
#####
#MainPlotEARAll
  #Main Function call for plotting EAR Values

#Inputs
  #ResultsEAR
    #Results from RunEARAll, see RunEARAll for details
  #File
    #Name of the PDF that the plot creates
    #if a file is not supplied a PDF will not be made
  #Sites
    #A character vector containing a list of sites to be plotted
    #Can be 'All' for all sites
  #Chemicals
    #A character vector containing a list of chemicals to be plotted
    #Can be 'All' for all Chemicals
  #Assay
    #A character vector containing a list of assays to be plotted
    #Can be 'All' for all Chemicals
  #SwitchAxis
    #Bool used to switch X and Y axes
  #SCrit
    #The criteria for sorting values on the graph
    #can be 'Mean', 'Sum', 'Median', 'WMedain', 'Active', 'Red', or 'Color'
  #Replot
    #Bool indicating if this is a plot made on an already created window or not
    #If a plotting window already exists and Replot is set to FALSE then an error will
    occur
  #Threshold
    #Minimum EAR value that a row or column must contain to appear on the graph
  #XMin, XMax, Ymin, Ymax
    #The minimum and maximum row and column numbers that are plotted
  #PchTy
    #Selects the function that handles the plotting symbols used

```

```

    #can be either 'GUI' or 'PDF'
#NonDetect
    #Argument to handle chemicals that are under the detection limit
    #can be 'Nothing','Circle',or 'Zero Out'
#MCrit
    #Selection criteria used when the size of Sites, Chemical and Assay are all larger
    then 1
    #Can be 'Ignore',
    #'Site - Smallest', 'Site - Largest','Site - Sum'
    #'Chemical - Smallest', 'Chemical - Largest', 'Chemical - Sum'
    #'Assay - Smallest', 'Assay - Largest', 'Assay - Sum'

#OutPut
    #A graph to a plotting window
    #A PDF to a file location

#Called By
    #NOTHING
    #PlotViewerGUI.EAR (GUI) [UpdateGraphButton]
    #PlotViewerGUI.EAR (GUI) [SaveGraphButton]
#Calls Directly \ Indirectly
    #ApplyUnderLimit
    #SumOverAllAssays
    #FilterEARDataAll
        #Which.Apply
        #CollapseData
            #WhichOverMinMax
            #GetValueOverCube
                #GetIndexVec
            #GetIndexVec
#SortDataAll
    #CalcChemWiegght
#PlotEARAll
    #GetpchPDF
    #GetpchGUI
    #Getcol
#SavePlotEARAll
    #PlotEARAll
        #GetpchPDF
        #GetpchGUI
        #Getcol
#####
#####
#ApplyUnderLimit
    #Fully build the under limit cube and applies it if selected

#Inputs
    #ResultsEAR
        #Results from RunEARAll, see RunEARAll for details
#BoolUnderLimit
    #Bool to select the use of the UnderLimit

```

```
#OutPut
  #ResultsEAR
    #Results from RunEARAll, see RunEARAll for details
    #Addition UnderLimit is now a cube
    #UnderLimit may have been applied to EARCube
```

```
#Called By
  #MainPlotEARAll
  #PlotViewerGUI.EAR (GUI) [SaveEARButton]
```

```
#Calls Directly \ Indirectly
  #NOTHING
```

```
#####
#####
```

```
#SumOverAllAssays
  #Adds a new chemical entry to that is the calculated sum EARs over for an assay over all
  chemicals
  #Is only called if Chemicals [in MainPlotEARAll] is set to 'All'
```

```
#Inputs
  #ResultsEAR
    #Results from RunEARAll, see RunEARAll for details
```

```
#OutPut
  #ResultsEAR
  #Results from RunEARAll, see RunEARAll for details
  #Addition UnderLimit is changed by the addition of 'Sum'
  #EARCube is changed by the addition of 'Sum'
  #ChemicalNames is changed by the addition of 'Sum'
  #MW is changed by the addition of 'Sum'
  #AC50s is changed by the addition of 'Sum'
```

```
#Called By
  #MainPlotEARAll
  #PlotViewerGUI.EAR (GUI) [SaveEARButton]
```

```
#Calls Directly \ Indirectly
  #NOTHING
```

```
#####
#####
```

```
#FilterEARDataAll
  #Filters the EAR results based on subset selection
```

```
#Inputs
  #ResultsEAR
    #Results from RunEARAll, see RunEARAll for details
  #Sites
```



```
#A character vector containing a list of sites to be plotted
#Can be 'All' for all sites
#Chemicals
#A character vector containing a list of chemicals to be plotted
#Can be 'All' for all Chemicals
#Assay
#A character vector containing a list of assays to be plotted
#Can be 'All' for all Chemicals
#NonDetect
#Argument to handle chemicals that are under the detection limit
#can be 'Nothing','Circle',or 'Zero Out'
#MCrit
#Selection criteria used when the size of Sites, Chemical and Assay are all larger
then 1
#Can be 'Ignore',
#'Site - Smallest', 'Site - Largest','Site - Sum'
#'Chemical - Smallest', 'Chemical - Largest', 'Chemical - Sum'
#'Assay - Smallest', 'Assay - Largest', 'Assay - Sum'
#OutPut
#FilteredData
#ResultsEAR Filtered by selections
#Contains
#EARCube
#Now 2 dimensional Array of EAR Values
#ChemicalNames
#A number of chemicals by 2 character vector that contain chemical names [
,1] and CAS numbers [ ,2]
#SiteData
#A data frame containing:
#USGS STATION NAME
#The Full Name of the Station
#FIELD NAME
#An abbreviated name of the station
#DATE COLLECTED
#The date of collection
#TIME COLLECTE
#The time the data is collected
#SAMPLE RECORD NUMBER
#A number unique to the collected sample
#Units
#MW
#A character vector that contains the molecular weights of each chemical as
its entries.
#The names of the vector are the chemicals themselves
#AC50s
#A number of assays by number of chemicals matrix
#The row names are the names of the assays
#UnderLimit
#Same size arraay as EARCube with values of 1 indicating that an
observation is under the detection limit
#RemoveListRow:
#List of enrties removed from the rows of EARCube due to Theshhold values
#RemoveListCol:
```

```

#List of entries removed from the columns of EARCube due to Theshhold values
#RowName
#Row axis label
#ColName
#Col axis label
#TitleName
#Dimention for title of graph

```

```

#Called By
#MainPlotEARAll
#PlotViewerGUI.EAR (GUI) [SaveEARButton]

```

```

#Calls Directly \ Indirectly
#Which.Apply
#CollapseData

```

```

#####
#####

```

```

#CollapseData
#Collapses part of the EAR Cube into the smallest of largest values of one dimension
#This function is designed to be called from FilterEARDataAll and can not run independent
of it

```

```

#Inputs
#FilteredData
#Data that is currently being filtered by FilterEARDataAll
#MCrit
#Selection criteria used when the size of Sites, Chemical and Assay are all larger
then 1
#Can be 'Ignore',
#'Site - Smallest', 'Site - Largest','Site - Sum'
#'Chemical - Smallest', 'Chemical - Largest', 'Chemical - Sum
#'Assay - Smallest', 'Assay - Largest', 'Assay - Sum
#NonDetect
#Argument to handle chemicals that are under the detection limit
#can be 'Nothing','Circle',or 'Zero Out'

```

```

#OutPut
#FilteredData
#FilterdData that has had UnderLimit and EARCube collapsed across one dimension

```

```

#Called By
#FilterEARDataAll
#Calls Directly \ Indirectly
#WhichOverMinMax
#GetValueOverCube
#GetIndexVec
#GetIndexVec

```

```

#####
#####

```

```

#GetValueOverCube
#Gets the value of UnderCube at location [i,e,Val]

```

```
#Inputs
  #Val
    #Value of the unknown dimension
  #i
    #The index of the first dimension
  #e
    #the index of the second dimension
#UnderCube
  #The UnderCube from FilterdData
#Dim
  #The dimensions UnderCube is searched on
```

```
#Output
  #UnderCube[Index[1],Index[2],Index[3]]
    #The value at the correct location
```

```
#Called By
  #CollapseData
#Calls Directly
  #GetIndexVec
```

```
#####
#####
```

```
#WhichOverMinMax
  #Which function for Min, max, mean, any find function that can take na.rm as an argument
```

```
#Inputs
  #Data
    #A rank 3 tensor to run a which (fun) on
  #fun
    #The function which is being used on
    #Created for either min or max
```

```
#Output
  #Out
    #A vector of indices
```

```
#Called By
  #CollapseData
#Calls Directly
  #NOTHING
```

```
#####
#####
```

```
#GetIndexVec
  #Gets an index vector based on Dim
  #This will rearrange the index vector to follow the dimensions of the Cube
```

```
#Inputs
  #VecIn
    #The index vector that is to be rearranged
  #Dim
    #The dimension filtering is on
```

```
#Output
#VecOut
#A vector of indexes in the correct order
```

```
#Called By
#CollapseData
#GetValueOverCube
```

```
#Calls Directly \ Indirectly
#NOTHING
```

```
#####
#####
```

```
#SortDataAll
#Sorts Data based on a sort criteria
```

```
#Inputs
#FilterdData
#Data filtered by FilterEARDataAll
#SCrit
#Sort criteria
#can be 'Mean', 'Sum', 'Median', 'WMedain', 'Active', 'Red', or 'Color'
```

```
#OutPut
#SortData
#FilterdData sorted by the sort criteria
```

```
#Called By
#MainPlotEARAll
#Calls Directly \ Indirectly
#CalcChemWiegth
```

```
#####
#####
```

```
#PlotEARAll
#Plots EAR results it uses something similar to a Cleveland dot plot
```

```
#Inputs
#Uses PlottingCat.EAR
#Data
#Data sorted and filtered by SortDataAll and FilterEARDataAll
#AddLegend
#Bool to include the legend
#Only used when saving the plot
#SwitchAxis
#Bool used to switch the X and Y axes
#Replot
#Bool indicating if the plotting window has already been established
#XMin, XMax, YMin, YMax
#Used to indicate the location of the first and last elements in the X and Y axis
#PchTy
#indicate the function that determines the plotting symbols
```

```
#Can be 'GUI' of 'PDF'  
#NonDetect  
#Determines the effect of locations under the detection limit  
#Can be 'Nothing', 'Circle', or 'Zero Out'
```

```
#OutPut  
#Either an update to the plotting window or PDF
```

```
#Called By  
#MainPlotEARAll  
#SavePlotEARAll
```

```
#Calls Directly/Indirectly  
#ApplyCharLimit  
#UnderToWhite  
#GetpchPDF  
#GetpchGUI  
#Getcol  
#GetLocation
```

```
#####  
#####
```

```
#GetpchPDF  
#Gets the plotting symbol used in the pdf
```

```
#Inputs  
#Uses global PlottingCat.EAR  
#Num  
#A number to determine what plotting symbol is used
```

```
#Output  
#A number or string that determines a plotting symbol
```

```
#Called By  
#PlotEARAll
```

```
#Calls Directly/Indirectly  
#NOTHING
```

```
#####  
#####
```

```
#GetpchGUI  
#Gets the plotting symbol used in the GUI
```

```
#Inputs  
#Uses global PlottingCat.EAR  
#Num  
#A number to determine what plotting symbol is used
```

```
#Output
```

```
#A number or string that determines a plotting symbol
```

```
#Called By
```

```
#PlotEARAll
```

```
#Calls Directly/Indirectly
```

```
#NOTHING
```

```
#####  
#####
```

```
#Getcol
```

```
#Function used to determin the plotting color
```

```
#Inputs
```

```
#Uses global PlottingCat.EAR
```

```
#Num
```

```
#A number to determine what color is used
```

```
#Output
```

```
#A string that determines a plotting color
```

```
#Called By
```

```
#PlotEARAll
```

```
#Calls Directly/Indirectly
```

```
#NOTHING
```

```
#####  
#####
```

```
#SavePlotEARAll
```

```
#Function called to save a plot to a PDF
```

```
#Inputs
```

```
#Data
```

```
#Data sorted and filtered by SortDataAll and FilterEARDataAll
```

```
#SwitchAxis
```

```
#Bool used to switch the X and Y axes
```

```
#XMin, XMax, YMin, YMax
```

```
#Used to indicate the location of the first and last elements in the X and Y axis
```

```
#NonDetect
```

```
#Determines the effect of locations under the detection limit
```

```
#Can be 'Nothing', 'Circle', or 'Zero Out'
```

```
#Called By
```

```
#MainPlotEARAll
```

```
#Calls Directly/Indirectly
```

```
#PlotEARAll
```

```
#ApplyCharLimit
```

```
#UnderToWhite
```

```
#GetpchPDF
```

```
#GetpchGUI
```

```
#Getcol
```

```
#GetLocation
```

```
#####  
#####  
#CalcChemWieght  
#Calculates the sorting wieght for an EAR value that is to be plotted  
#Ment to be called using the apply function  
  
#Inputs  
#Uses PlottingCat.EAR  
#Vec  
#A vector of numbers  
#SCrit  
#Sort criteria  
#can be 'Mean', 'Sum', 'Median', 'WMedain', 'Active', 'Red', or 'Color'  
  
#Output  
#Wieght  
#A vector of plotting weights that can be sorted on  
  
#Called By  
#SortDataAll  
#Calls Directly/Indirectly  
#NOTHING  
  
#####  
#####  
#ApplyCharLimit  
#Apply a Character limit, removes right white space, pads left white space, can change  
chemical name to formula  
  
#Inputs  
#String  
#Sting to be filtered  
#Limit  
#Max and Min size of the output string  
  
#IsChemical  
#Bool indicating whether the sting is a chemical or not  
  
#Uses global ChemInfoList.EAR  
  
#OutPut  
#NewString  
#Sting containing of 'Limit' number of characters  
  
#Called By  
#PlotEAR  
#Calls Directly \ Indirectly  
#NOTHING  
  
#####  
#####  
#UnderToWhite
```

```
#Changes underscores in a string to while space
```

```
#Inputs
```

```
#Str
```

```
#A string to be converted
```

```
#OutPut
```

```
#Str
```

```
#A string with all underscores in the string converted to white space
```

```
#Called By
```

```
#PlotEAR
```

```
#Calls Directly \ Indirectly
```

```
#NOTHING
```

```
#####  
#####
```

```
#getLocation
```

```
#Attains the locations within EAR Cube that are between ValueMin and ValueMax
```

```
#Inputs
```

```
#EARCube
```

```
#EAR calues that are prepared to be plotted
```

```
#ValueMin
```

```
#Min Value of an entry of EARCube to be plotted
```

```
#ValueMax
```

```
#Max Value of an entry of EARCube to be plotted
```

```
#UseNA
```

```
#Bool, when TRUE it finds the locations of NA within EARCube
```

```
#OutPut
```

```
#Points
```

```
#A 2-column matrix containing the X and Y cordanites of the points
```

```
#Called By
```

```
#PlotEAR
```

```
#Calls Directly \ Indirectly
```

```
#NOTHING
```

```
#####  
#####
```

```
#Which.Apply
```

```
#Which to be called though an apply function
```

```
#Inputs
```

```
#Value
```

```
#The value being seached on
```

```
#Vec
```

```
#The vector being searched
```

```
#Output
```



```

#N
#The index number of value in vector

#Called By
#FilterEARDataAll
#Calls Directly \ Indirectly
#NOTHING

#####
#####
#
Functions                                     #
#####
#####
MainPlotEARAll<-function(ResultsEAR,File=NULL,Sites='All',Chemicals='All',Assay='All',SwitchAxis
=FALSE,SCrit='Color',
  Replot=FALSE,Threshold=NA,XMin=1,XMax=100,YMin=1,YMax=60,PchTy='GUI',NonDetect='Nothing'
  ,MCrit='Ignore'){
#Main function call to plot EAR results
#ResultsEAR Results from RunEAR
#File, if supplied it will same the graph to a named file
#Sites are the subset of sites used in plotting
#Chemicals are the chemicals used for graphing
#SwitchAxis Flip X and Y axis

  Check<-TRUE
#Check inputs
  if (Sites=='All' && Chemicals=='All' && Assay=='All'){
    Check<-FALSE
    if (MCrit !='Ignore'){
      Check<-TRUE
    }
  }

  if (length(Sites)>1 && length(Chemicals)>1 && length(Assay)>1){
    Check<-FALSE
    if (MCrit !='Ignore'){
      Check<-TRUE
    }
  }
  if (Check ==FALSE){
    message('Only one Site, or one Chemical or one Assay must be selected')
    return()
  }

#Condition to apply UnderLimit  TRUE-> it is applied FALSE-> it is skipped
BoolUnderLimit<-{NonDetect == 'Zero Out'}
ResultsEAR<-ApplyUnderLimit(ResultsEAR,BoolUnderLimit)

#Add the sum of EARs of chemicals over all Assays
if ({Chemicals=='All' || length(which(Chemicals=='Sum'))>0}){
  ResultsEAR<-SumOverAllAssays(ResultsEAR)
}

```

```
#Filter the Data
```

```
FilteredData<-FilterEARDataAll (ResultsEAR, Sites, Chemicals, Assay, Threshold, NonDetect, MCrit)
```

```
#Sort on EAR
```

```
SortedData<-SortDataAll (FilteredData, SCrit=SCrit)
```

```
#Plot The Data
```

```
if (is.null(File)==TRUE) {
  PlotEARAll (SortedData, AddLegend=FALSE, SwitchAxis, Replot, XMin, XMax, YMin, YMax, PchTy,
  NonDetect)
}
```

```
#Save the plot
```

```
if (is.null(File)==FALSE) {
  File=paste (File, '.pdf')
  SavePlotEARAll (SortedData, File, SwitchAxis, XMin, XMax, YMin, YMax, PchTy, NonDetect)
}
```

```
return()
```

```
#####
#####
```

```
ApplyUnderLimit<-function (ResultsEAR, BoolUnderLimit=FALSE) {
#Applies the under limit when the zero out selection is used
#BoolUnderLimit is to select to apply the under limit
```

```
#Get under limit to be a multiplier
```

```
UnderLimit<-apply (!ResultsEAR$UnderLimit, 2, as.numeric)
```

```
#Cube the under limit data
```

```
Dim<-dim (ResultsEAR$EARCube)
UnderCube<-array (rep (UnderLimit, Dim[3]), dim=Dim)
```

```
#Apply the under cube
```

```
if ( BoolUnderLimit==TRUE ){
  ResultsEAR$EARCube<-ResultsEAR$EARCube*UnderCube
}
ResultsEAR$UnderLimit<-(UnderCube-1)*-1
```

```
return (ResultsEAR)
```

```
#####
#####
```

```
SumOverAllAssays<-function (ResultsEARAll) {
```

```
#Function Adds a new chemical entry to that is the calculated sum EARs over for an assay over
all chemicals
```

```
#Update identifier structures with 'Sum'
```

```
#The ChemicalNames data structure
  ResultsEARAll$ChemicalNames<-rbind (ResultsEARAll$ChemicalNames, 'Sum')
#The MW data structure
```

```

ResultsEARAll$MW<-c (ResultsEARAll$MW, NA)
names (ResultsEARAll$MW) [length (ResultsEARAll$MW) ] <-'Sum'
#The AC data structure
ResultsEARAll$AC50s<-cbind (ResultsEARAll$AC50s, NA)

#Update EARCube with Sum
AssaySum<-apply (ResultsEARAll$EARCube, c (1,3), sum, na.rm=TRUE)
ResultsEARAll$EARCube<-abind (ResultsEARAll$EARCube, AssaySum, along = 2)

#UnderLimit
ResultsEARAll$UnderLimit<-abind (ResultsEARAll$UnderLimit, AssaySum*0, along = 2)

return (ResultsEARAll)
}
#####
#####

FilterEARDataAll<-function (ResultsEARAll, Sites, Chemicals, Assay, Threshold=NA, NonDetect, MCrit) {
#Filters the EAR results
#Removes site, chemicals, assays not selected
#Removes Rows and columns that contain now information
#ResultsEARAll Results from CalculatedAllEAR
#Sites array of sites selected can be 'All'
#Must be a sample record number
#Chemicals array of chemicals selected can be 'All'
#Assay array of assays selected can be 'All'
FilteredData<-ResultsEARAll;
options (warn=-1) #Turn off warnings as they are know
#Filter out non-selected entries
if (Sites !='All'){
KeepSites<-sapply (Sites, Which.Apply, ResultsEARAll$SiteData [['SAMPLE RECORD NUMBER']])
KeepSites<-sort (as.vector (unlist (KeepSites)))
#Check to see if there is a matching site in the data set
if (length (KeepSites)==0) {
message ('Please Select a Site in the Data Set')
return (NULL)
}
#Remove Non-selected Sites
FilteredData$EARCube<-FilteredData$EARCube [KeepSites, , ]
FilteredData$SiteData<-FilteredData$SiteData [KeepSites, ]

#Prep UnderLimit
FilteredData$UnderLimit<-FilteredData$UnderLimit [KeepSites, , ]
}
if (Chemicals !='All'){
KeepChemicals<-sapply (Chemicals, Which.Apply, ResultsEARAll$ChemicalNames [ ,2])
KeepChemicals<-sort (as.vector (unlist (KeepChemicals)))
#Check to see if there is a matching Chemical in the data set
if (length (KeepChemicals)==0) {
message ('Please Select a Chemicals in the Data Set')
return (NULL)
}
}
}

```

```

#Remove Non-selected Sites
  if (length(dim(FilterData$EARCube))==2) {
    FilterData$EARCube<-FilterData$EARCube[KeepChemicals, ]

    #UnderLimit
    FilterData$UnderLimit<-FilterData$UnderLimit[KeepChemicals , ]
  }
  if (length(dim(FilterData$EARCube))==3) {
    FilterData$EARCube<-FilterData$EARCube[ ,KeepChemicals, ]
    #UnderLimit
    FilterData$UnderLimit<-FilterData$UnderLimit[ ,KeepChemicals, ]
  }

  FilterData$ChemicalNames<-FilterData$ChemicalNames[KeepChemicals, ]
  FilterData$AC50s<-FilterData$AC50s[ ,KeepChemicals]
  FilterData$MW<-FilterData$MW[KeepChemicals]
}
if (Assay !='All'){
  #Correct for the change in the data structure when on one chemical is present
  if (is.null(rownames(FilterData$AC50s))==FALSE) {
    KeepAssay<-sapply(Assay,Which.Apply,rownames(FilterData$AC50s))
    KeepAssay<-sort(as.vector(unlist(KeepAssay)))
    FilterData$AC50s<-FilterData$AC50s[KeepAssay, ]
  }else{
    KeepAssay<-sapply(Assay,Which.Apply, names(FilterData$AC50s))
    KeepAssay<-sort(as.vector(unlist(KeepAssay)))
    FilterData$AC50s<-FilterData$AC50s[KeepAssay]
  }
}

#Check to see if there is a matching Chemical in the data set
  if (length(KeepAssay)==0) {
    message('Please Select a Assay in the Data Set')
    return(NULL)
  }
#Remove Non-selected Sites
  if (length(dim(FilterData$EARCube))==2) {
    FilterData$EARCube<-FilterData$EARCube[ ,KeepAssay]
    #UnderLimit
    FilterData$UnderLimit<-FilterData$UnderLimit[ ,KeepAssay]
  }
  if (length(dim(FilterData$EARCube))==3) {
    FilterData$EARCube<-FilterData$EARCube[ , ,KeepAssay]
    #UnderLimit
    FilterData$UnderLimit<-FilterData$UnderLimit[ , ,KeepAssay]
  }
}

#Find Min/Max if applicable
  if (MCrit != 'Ignore'){
    FilterData<-CollapseData(FilterData,MCrit,NonDetect)
  }

```

}

#Figure out plotting dimensions

```

if (is.null(dim(FilteredData$AC50s))==TRUE) {
  TitleD<-'Assay' #Site,Chemical #priority 3
  if (MCrit !='Assay - Largest' && MCrit !='Assay - Smallest' && MCrit !='Assay - Sum'
  ){
    TitleAdd<-Assay
  }else{
    TitleAdd<-strsplit(MCrit,' - ')[[1]][2]
  }
  FilteredData[['TitleAdd']]<-TitleAdd
  RowName<- 'Site'
  ColName<- 'Chemical'
}

```

```

if (length(FilteredData$MW)==1) {
  TitleD<- 'Chemical' #Site, Assay #priority 2
  RowName<- 'Site'
  ColName<- 'Assay'
}

```

```

if (dim(FilteredData$SiteData)[1]==1) {
  TitleD<- 'Site' #Chemical, Assay #priority 1
  RowName<- 'Chemical'
  ColName<- 'Assay'
}

```

#EARCube Starts as Site,Chemical,Assay

#ends as Site,Chemical

#or Site, Assay

#or Chemical, Assay

#FilteredData\$EARCube should be a matrix now

#Next Step is to remove all row and columns that contain nothing but NA

#Get rows and columns to be removed

RemoveCols&lt;-which(colSums(is.finite(FilteredData\$EARCube))==0)

RemoveRows&lt;-which(colSums(t(is.finite(FilteredData\$EARCube)))==0)

#Filter Out Based on Threshold

```

if (is.finite(Threshold)==TRUE) {
  RemoveCols<-c(RemoveCols,which(colSums(FilteredData$EARCube>Threshold,na.rm=TRUE)==0))
  RemoveCols<-unique(RemoveCols)
  RemoveRows<-c(RemoveRows,which(colSums(t(FilteredData$EARCube)>Threshold,na.rm=TRUE)==0))
  RemoveRows<-unique(RemoveRows)
}

```

#Remove rows and columns and #Update Stored Information

```

if (length(RemoveCols)>0) {
  FilteredData$EARCube<-FilteredData$EARCube[ ,-RemoveCols];
  #Apply Removal to UnderLimit
  FilteredData$UnderLimit<-FilteredData$UnderLimit[ ,-RemoveCols]
  if (ColName=='Chemical'){

```

```

RemoveListCol<-names (FilteredData$MW[RemoveCols]) #Chemical

FilteredData$ChemicalNames<-FilteredData$ChemicalNames[-RemoveCols, ]
if (is.null(dim(FilteredData$AC50s))==TRUE) {
  FilteredData$AC50s<-FilteredData$AC50s[-RemoveCols]
}else{
  FilteredData$AC50s<-FilteredData$AC50s[ , -RemoveCols]
}
FilteredData$MW<-FilteredData$MW[-RemoveCols]

}
if (ColName=='Assay'){
  RemoveListCol<-names (FilteredData$AC50s[RemoveCols]) #Assay
  if (is.null(dim(FilteredData$AC50s))==TRUE) {
    FilteredData$AC50s<-FilteredData$AC50s[-RemoveCols];
  }else{
    FilteredData$AC50s<-FilteredData$AC50s[-RemoveCols, ];
  }
}

FilteredData[['RemoveListCol']]<-RemoveListCol

}
if (length(RemoveRows)>0) {
  FilteredData$EARCube<-FilteredData$EARCube[-RemoveRows, ];
  #Apply Removal to UnderLimit
  FilteredData$UnderLimit<-FilteredData$UnderLimit[-RemoveRows, ]

  if (RowName=='Site'){ #Chemical, Assay
    RemoveListRow<-FilteredData$SiteData[-RemoveRows, 'USGS STATION NAME'] #Site

    FilteredData$SiteData<-FilteredData$SiteData[-RemoveRows, ]
  }
  if (RowName=='Chemical'){
    RemoveListRow<-names (FilteredData$MW[RemoveRows]) #Chemical

    FilteredData$ChemicalNames<-FilteredData$ChemicalNames[-RemoveRows, ]
    FilteredData$AC50s<-FilteredData$AC50s[ , -RemoveRows]
    FilteredData$MW<-FilteredData$MW[-RemoveRows]
  }
  FilteredData[['RemoveListRow']]<-RemoveListRow
}

FilteredData[['RowName']]<-RowName
FilteredData[['ColName']]<-ColName
FilteredData[['TitleName']]<-TitleD

if(length(dim(FilteredData$EARCube))<2) {
  pop_message('Your Selection criteria has caused the data to only have 1 dimension.\n

```

```
Because of this the EAR calculator can not produce a plot.')
```

```
}
```

```
return(FilteredData)
```

```
}
```

```
#####  
#####
```

```
CollapseData<-function(FilteredData,MCrit,NonDetect){
```

```
#Collapses the data set to take the largest or smallest value of a dimension
```

```
#This function triggers if criteria for multiple selection is not set to ignore
```

```
#EarCube must still have three dimensions for this to work
```

```
#MCrit is the Criteria for multiple selections
```

```
#Check dimensions of EAR Cube
```

```
if(length(dim(FilteredData$EARCube))<3){
```

```
  return(FilteredData)
```

```
}
```

```
#Remove "Sum" from chemicals if applicable
```

```
if (length(which(FilteredData$Chemical[ ,1]=='Sum')) > 0){
```

```
  #Last value of chemical dimension is sum
```

```
  FilteredData$EARCube<-FilteredData$EARCube[ , -dim(FilteredData$EARCube)[2], ]
```

```
}
```

```
#Assay
```

```
if (MCrit=='Assay - Largest'){
```

```
  Dim<-c(1,2)
```

```
  fun<-max
```

```
  FilteredData$AC50s<-'Largest'
```

```
}
```

```
if (MCrit=='Assay - Smallest'){
```

```
  Dim<-c(1,2)
```

```
  fun<-min
```

```
  FilteredData$AC50s<-'Smallest'
```

```
}
```

```
if (MCrit=='Assay - Sum'){
```

```
  Dim<-c(1,2)
```

```
  fun<-sum
```

```
  FilteredData$AC50s<-'Sum'
```

```
}
```

```
#Site
```

```
if (MCrit=='Site - Largest'){
```

```
  Dim<-c(2,3)
```

```
  fun<-max
```

```
  FilteredData$SiteData[1,1:2]<-'Largest'
```

```
  FilteredData$SiteData[1,3:4]<-''
```

```
  FilteredData$SiteData[1,5:6]<-'Largest'
```

```

    FilteredData$SiteData<-FilteredData$SiteData[1, ]
  }
  if (MCrit=='Site - Smallest'){
    Dim<-c(2,3)
    fun<-min
    FilteredData$SiteData[1,1:2]<-'Smallest'
    FilteredData$SiteData[1,3:4]<-''
    FilteredData$SiteData[1,5:6]<-'Smallest'
    FilteredData$SiteData<-FilteredData$SiteData[1, ]
  }
  if (MCrit=='Site - Sum'){
    Dim<-c(2,3)
    fun<-sum
    FilteredData$SiteData[1,1:2]<-'Sum'
    FilteredData$SiteData[1,3:4]<-''
    FilteredData$SiteData[1,5:6]<-'Sum'
    FilteredData$SiteData<-FilteredData$SiteData[1, ]
  }
}

```

## #Chemical

```

if (MCrit=='Chemical - Largest'){
  Dim<-c(1,3)
  fun<-max
  #FilteredData$ChemicalNames<-c('Largest','Largest')
  #FilteredData$MW<-c('Largest','Largest')
  #names(FilteredData$MW)<-c('Largest','Largest')
  FilteredData$ChemicalNames<-c('Largest')
  FilteredData$MW<-c('Largest')
  names(FilteredData$MW)<-c('Largest')
}
if (MCrit=='Chemical - Smallest'){
  Dim<-c(1,3)
  fun<-min
  #FilteredData$ChemicalNames<-c('Smallest','Smallest')
  #FilteredData$MW<-c('Smallest','Smallest')
  #names(FilteredData$MW)<-c('Smallest','Smallest')
  FilteredData$ChemicalNames<-c('Smallest')
  FilteredData$MW<-c('Smallest')
  names(FilteredData$MW)<-c('Smallest')
}
if (MCrit=='Chemical - Sum'){
  Dim<-c(1,3)
  fun<-sum
  #FilteredData$ChemicalNames<-c('Smallest','Smallest')
  #FilteredData$MW<-c('Smallest','Smallest')
  #names(FilteredData$MW)<-c('Smallest','Smallest')
  FilteredData$ChemicalNames<-c('Sum')
  FilteredData$MW<-c('Sum')
  names(FilteredData$MW)<-c('Sum')
}
}

```



```

#get min or max
Square<-apply(FilteredData$EARCube,Dim,fun,na.rm=TRUE)
if (length(which(!is.finite(Square)))>0) {
  Square[which(!is.finite(Square))]<-NA
}

#Get the Values of UnderLimit
#Double for loop :(
#Vectorize later if time allows
Size<-dim(Square)
UnderSquare<-mat.or.vec(Size[1],Size[2]) #Sets this to all zeros if UnderSquare is not
used
#Only change UnderSquare if it is used for a Circle (This is done for speed)
if (NonDetect=='Circle'){
  #Find corresponding Under Limit
  UnderCube<-FilteredData$UnderLimit
  UnderSquareLoc<-apply(FilteredData$EARCube,Dim,WhichOverMinMax,fun)
  for (i in 1:Size[1]){
    for (j in 1:Size[2]){
      UnderLoc<-UnderSquareLoc[i,j][[1]]
      if (length(UnderLoc)>1) {
        Values<-sapply(UnderLoc,GetValueOverCube,i,j,UnderCube,Dim)
        UnderLoc<-UnderLoc[max(which(Values==min(Values)))]
      }
      if (is.na(UnderLoc)==FALSE) {
        UseLoc<-GetIndexVec(c(i,j,UnderLoc),Dim)
        UnderSquare[i,j]<-UnderCube[UseLoc[1],UseLoc[2],UseLoc[3]]
      }
    }
  }
}

#Set into Data set
FilteredData$EARCube<-Square
FilteredData$UnderLimit<-UnderSquare

return(FilteredData)
}
#####
#####

WhichOverMinMax<-function(Data,fun){
#Which function for Min, max, mean, any find function that can take na.rm as an argument
Out<-which(Data==fun(Data,na.rm=TRUE))
if (length(Out)==0) {
  return(NA)
}
return(Out)
}
#####
#####

```

```

GetValueOverCube<-function(Val,i,e,UnderCube,Dim) {
#Gets the value of UnderCube at location [i,e,Val]
#Modified by GetIndexVec
  Index<-GetIndexVec(c(i,e,Val),Dim)
  return(UnderCube[Index[1],Index[2],Index[3]])
}
#####
#####

GetIndexVec<-function(VecIn,Dim) {
#Gets an index vector based on Dim
#Used in CollapseData to adjust for the changing dimensions of the 3D vector
#Vec in contains the values for Dim[1],Dim[2], then the max/min Dim

#Initiate Vec Out
  VecOut<-rep(0,3)
#Resort
  VecOut[Dim[1]]<-VecIn[1]
  VecOut[Dim[2]]<-VecIn[2]
  VecOut[which(VecOut==0)]<-VecIn[3]
return(VecOut)
}
#####
#####

SortDataAll<-function(FilteredData,SCrit='Mean'){
#Sorts the data to be plotted
#Only Called by MainPlotEARAll
#SCrit is the criteria to sort on
#FilteredData is data filtered by the previous step
#Get order
  Data<-FilteredData$EARCube
  WieghtVec1<-apply(Data,1,CalcChemWieght,SCrit) #Rows
  WieghtVec2<-apply(Data,2,CalcChemWieght,SCrit) #Columns
#Apply order to plotted data
  Data<-Data[,order(WieghtVec2, decreasing=TRUE)] #Columns
  Data<-Data[order(WieghtVec1, decreasing=TRUE), ] #Rows
#Apply order to Under Limit
  FilteredData$UnderLimit<-FilteredData$UnderLimit[,order(WieghtVec2, decreasing=TRUE)]
  FilteredData$UnderLimit<-FilteredData$UnderLimit[order(WieghtVec1, decreasing=TRUE), ]

  FilteredData$EARCube<-Data
#Update Identifiers with With Order
  if (FilteredData$RowName=='Site'){
    FilteredData$SiteData<-FilteredData$SiteData[order(WieghtVec1, decreasing=TRUE), ]
  }
  if (FilteredData$RowName=='Chemical'){
    FilteredData$ChemicalNames<-FilteredData$ChemicalNames[order(WieghtVec1, decreasing=TRUE), ]
    FilteredData$AC50s<-FilteredData$AC50s[,order(WieghtVec1, decreasing=TRUE)]
    FilteredData$MW<-FilteredData$MW[order(WieghtVec1, decreasing=TRUE)]
  }
}

```

```

if (FilteredData$ColName=='Chemical') {
  FilteredData$ChemicalNames<-FilteredData$ChemicalNames[order(WieghtVec2, decreasing=TRUE
), ]
  if (is.null(dim(FilteredData$AC50s))==TRUE) {
    FilteredData$AC50s<-FilteredData$AC50s[order(WieghtVec2, decreasing=TRUE) ]
  }else{
    FilteredData$AC50s<-FilteredData$AC50s[ ,order(WieghtVec2, decreasing=TRUE) ]
  }
  FilteredData$MW<-FilteredData$MW[order(WieghtVec2, decreasing=TRUE) ]
}

```

```

if (FilteredData$ColName=='Assay') {
  if (is.null(dim(FilteredData$AC50s))==TRUE) {
    FilteredData$AC50s<-FilteredData$AC50s[order(WieghtVec2, decreasing=TRUE) ]
  }else{
    FilteredData$AC50s<-FilteredData$AC50s[order(WieghtVec2, decreasing=TRUE), ]
  }
}

```

```

return(FilteredData)
}

```

```

#####
#####

```

```

PlotEARAll<-function(Data,AddLegend=FALSE,SwitchAxis=FALSE,Replot=FALSE,XMin=NULL,XMax=NULL,YMin
=NULL,YMax=NULL,PchTy='GUI',NonDetect='Nothing') {

```

```

#This function plots EAR results it uses something similar to a Cleveland dot plot

```

```

#Get Y-axis (Column of EARCube)

```

```

YAxis<-Data$ColName

```

```

if (YAxis=='Chemical') {

```

```

  YLabels<-Data$ChemicalNames[ ,1]

```

```

  YLabels<-unlist(lapply(YLabels,ApplyCharLimit,32,TRUE))

```

```

  DimGraphY<-length(YLabels)

```

```

}

```

```

if (YAxis=='Assay') {

```

```

  YLabels<-rownames(Data$AC50s)

```

```

  if (is.null(YLabels))==TRUE) {

```

```

    YLabels<-names(Data$AC50s)

```

```

  }

```

```

  YLabels<-unlist(lapply(YLabels,ApplyCharLimit,32,FALSE))

```

```

  DimGraphY<-length(YLabels)

```

```

}

```

```

if (YAxis=='Site') {

```

```

  SiteData<-Data$SiteData

```

```

  FieldNames<-Data[['FIELD NAME']]

```

```

  FieldNames<-unlist(lapply(FieldNames,ApplyCharLimit,14,FALSE))

```

```

  Dates<-Data[['DATE COLLECTED']]

```

```

  Dates<-unlist(lapply(Dates,ApplyCharLimit,10,FALSE))

```

```

  Times<-Data[['TIME COLLECTED']]

```

```

  Times<-unlist(lapply(Times,ApplyCharLimit,5,FALSE))

```

```

    DimGraphY<-dim(SiteData) [1]
  }
#Get X-axis (Column of EARCube)
XAxis<-Data$RowName
if (XAxis=='Chemical'){
  XLabels<-Data$ChemicalNames[ ,1]
  XLabels<-unlist(lapply(XLabels,ApplyCharLimit,35,TRUE))
  DimGraphX<-length(XLabels)
}
if (XAxis=='Assay'){
  XLabels<-rownames(Data$AC50s)
  XLabels<-unlist(lapply(XLabels,ApplyCharLimit,35,FALSE))
  DimGraphX<-length(XLabels)
}
if (XAxis=='Site'){
  SiteData<-Data$SiteData
  FieldNames<-SiteData[['FIELD NAME']]
  FieldNames<-unlist(lapply(FieldNames,ApplyCharLimit,14,FALSE))
  Dates<-SiteData[['DATE COLLECTED']]
  Dates<-unlist(lapply(Dates,ApplyCharLimit,10,FALSE))
  Times<-SiteData[['TIME COLLECTED']]
  Times<-unlist(lapply(Times,ApplyCharLimit,5,FALSE))
  XLabels<-paste(FieldNames,Dates,Times)
  DimGraphX<-dim(SiteData) [1]
}
#Switch Axes if need be
if (SwitchAxis==TRUE){
  TAxis<-XAxis
  TLabels<-XLabels
  DimGraphT<-DimGraphX
  XAxis<-YAxis
  XLabels<-YLabels
  DimGraphX<-DimGraphY
  YAxis<-TAxis
  YLabels<-TLabels
  DimGraphY<-DimGraphT
  Data$EARCube<-t(Data$EARCube)
  Data$UnderLimit<-t(Data$UnderLimit)
}

XLabels<-unlist(lapply(XLabels,UnderToWhite))
YLabels<-unlist(lapply(YLabels,UnderToWhite))

#Build Title
Title<-'EAR Results for '
TitleAdd<-switch(Data$TitleName,
  "Chemical"=paste("the Chemical: ",names(Data$MW) [1],sep=' '),
  "Assay"=paste("the Assay: ",Data$TitleAdd,sep=' '),
  "Site"=paste("the Site:", Data$SiteData [2],Data$SiteData [3],Data$SiteData [4])
)
Title<-paste(Title,TitleAdd,sep=' ')
EARCube<-Data$EARCube

```

```
#Apply Dimension Restrictions
```

```
#Test Restrictions
```

```
if (is.null(XMin)==FALSE && is.null(XMax)==FALSE && is.null(YMin)==FALSE && is.null(YMax)==
FALSE) {
  if (XMin>DimGraphX) {
    XMin=DimGraphX;
  }
  if (YMin>DimGraphY) {
    YMin=DimGraphY;
  }
  if (XMax>DimGraphX) {
    XMax=DimGraphX;
  }
  if (YMax>DimGraphY) {
    YMax=DimGraphY;
  }
  EARCcube<-EARCube[XMin:XMax,YMin:YMax]
  DimGraphX=XMax-XMin+1
  DimGraphY=YMax-YMin+1
  XLabels<-XLabels[XMin:XMax]
  YLabels<-YLabels[YMin:YMax]
  UnderLimit<-Data$UnderLimit[XMin:XMax,YMin:YMax]
}
```

```
#Set Text and pt Size
```

```
cexY=0.50 # (0.3 to 0.5)
cexY=max(0.3, 0.5-0.002*DimGraphY)
cexX=0.50 # (0.3 to 0.5)
cexX=max(0.3, 0.5-0.002*DimGraphX)
CexPt=1 # (0.6 to 1.0)
CexPt=max(0.6, 0.1-0.004*CexPt)
```

```
#Make the plot
```

```
if (Replot==FALSE) {
  par('mai'=par('mai')*c(2,2,1,0.75))
}
plot(c(1,DimGraphX),c(1, DimGraphY), type="n", axes=FALSE, frame.plot=TRUE, xlab="", ylab=""
,main=Title)
axis(2, 1:DimGraphY,YLabels, labels = FALSE, pos=par("usr")[1],tck=-.01)
text(y = 1:DimGraphY, par("usr")[1], labels = YLabels, srt = 0, pos = 2, offset=0.3 , xpd =
TRUE,cex=cexY)

axis(1, 1:DimGraphX,XLabels, labels = FALSE, pos=par("usr")[3],tck=-.01)
text(x = 1:DimGraphX, par("usr")[3]-0.02*DimGraphY, labels = XLabels, srt = 90, pos = 2,
offset=0.01 , xpd = TRUE,cex=cexX)
```

```
#Set the plotting symbols
```

```
Getpch<-switch(PchTy,
  PDF=GetpchPDF,
  GUI=GetpchGUI
)
```

```
#Adjust the UnderLimit for NAs
```

```
if (length(which(is.na(EARCube)==TRUE))>0) {
  EARCubeNA<-EARCube
  EARCubeNA[which(is.na(EARCube)==TRUE)]<-0
  UnderLimit<-UnderLimit*(EARCubeNA!=0)
}
```

```
#Apply the UnderLimit(Uses Ranges)
```

```
#Changed for PlottingCat.EAR
```

```
PointsNA<-GetLocation(EARCube,0,0,TRUE)
Points1<-GetLocation(EARCube,0,PlottingCat.EAR[1],FALSE)
Points2<-GetLocation(EARCube,PlottingCat.EAR[1],PlottingCat.EAR[2],FALSE)
Points3<-GetLocation(EARCube,PlottingCat.EAR[2],PlottingCat.EAR[3],FALSE)
Points4<-GetLocation(EARCube,PlottingCat.EAR[3],10^10,FALSE)
```

```
#Plot each category (Uses Ranges)
```

```
#Changed to reflect changes in the EAR categories
```

```
points(PointsNA,pch=Getpch(NA),col=Getcol(NA),cex=CexPt)
points(Points1,pch=Getpch(0),col=Getcol(0),cex=CexPt)
points(Points2,pch=Getpch(PlottingCat.EAR[1]),col=Getcol(PlottingCat.EAR[1]),cex=CexPt)
points(Points3,pch=Getpch(PlottingCat.EAR[2]),col=Getcol(PlottingCat.EAR[2]),cex=CexPt)
points(Points4,pch=Getpch(PlottingCat.EAR[3]),col=Getcol(PlottingCat.EAR[3]),cex=CexPt)
```

```
#Add Circle to plots if need be
```

```
if (NonDetect=='Circle'){
  Points5<-GetLocation(UnderLimit,0.9,1.1,FALSE)
  points(Points5,pch=1,col='black',cex=CexPt*1.2)
}
```

```
#Add legend, only used when saving as a PDF
```

```
#Changed for PlottingCat.EAR
```

```
if (AddLegend==TRUE){
  par(xpd=TRUE)
  if (NonDetect!='Circle'){
    legend(x=par("usr")[1],y=par("usr")[3], cex = 0.75,
           c('No Calculation',
             paste0('EAR < ',PlottingCat.EAR[1]),
             paste0(PlottingCat.EAR[1], ' <= EAR < ', PlottingCat.EAR[2]),
             paste0(PlottingCat.EAR[2], ' <= EAR < ', PlottingCat.EAR[3]),
             paste0(' EAR >= ',PlottingCat.EAR[3])),
           col=c('black','black','blue','green','red'), pch=c(4,20,16,16,16),xjust=1,yjust=
             1)
  }
  if (NonDetect=='Circle'){
    legend(x=par("usr")[1],y=par("usr")[3], cex = 0.75,
           c('No Calculation',
             paste0('EAR < ',PlottingCat.EAR[1]),
             paste0(PlottingCat.EAR[1], ' <= EAR < ', PlottingCat.EAR[2]),
             paste0(PlottingCat.EAR[2], ' <= EAR < ', PlottingCat.EAR[3]),
             paste0(' EAR >= ',PlottingCat.EAR[3]),
             '<Detection Limit'),
           col=c('black','black','blue','green','red','black'), pch=c(4,20,16,16,16,1),
```

```

        xjust=1,yjust=1)
    }
}

#####
#####

GetpchPDF<-function(Num) {
#gets the plotting symbol for PlotEAR
#Now uses global PlottingCat.EAR
  if (is.na(Num)==TRUE) {
    return('x')
  }
  if (Num < PlottingCat.EAR[1]){
    return('.')
  }
  if (Num >= PlottingCat.EAR[1]){
    return(16) #R for filled in circle
  }
message('Error Unknown Value For EAR')
return('x')
}

#####
#####

GetpchGUI<-function(Num) {
#gets the plotting symbol for PlotEAR
#Now uses global PlottingCat.EAR
#last updated 12-24-2015 JS
  if (is.na(Num)==TRUE) {
    return('x')
  }
  if (Num < PlottingCat.EAR[1]){
    return('.')
  }
  if (Num >= PlottingCat.EAR[3]){
    return(13) #R for filled in circle
  }
  if (Num >= PlottingCat.EAR[2]){
    return(19) #R for filled in circle
  }

  if (Num >= PlottingCat.EAR[1]){
    return(20) #R for filled in circle
  }

message('Error Unknown Value For EAR')
return('x')
}

#####
#####

```

```

Getcol<-function(Num) {
#gets the plotting color for PlotEAR
#Now uses global PlottingCat.EAR
#last updated 12-24-2015 JS
  if (is.na(Num)==TRUE) {
    return('black')
  }
  if (Num < PlottingCat.EAR[1]){
    return('black')
  }
  if (Num >= PlottingCat.EAR[1] && Num < PlottingCat.EAR[2]){
    return('blue')
  }
  if (Num >= PlottingCat.EAR[2] && Num < PlottingCat.EAR[3]){
    return('green')
  }
  if (Num >= PlottingCat.EAR[3]){
    return('red')
  }
message('Error Unknown Value For EAR')
return('black')
}
#####
#####

SavePlotEARAll<-function(SortedData,File,SwitchAxis,XMin,XMax,YMin,YMax,PchTy,NonDetect) {
#Saves the plot of EAR Results
pdf(File)
  PlotEARAll(SortedData,TRUE,SwitchAxis,FALSE,XMin,XMax,YMin,YMax,'PDF',NonDetect)

dev.off()
}
#####
#####

CalcChemWiegght<-function(Vec,SCrit){
#Calculates a rank-able metric for a vector vector
#Used to determine A Chemicals average impact from an apply function
#uses global PlottingCat.EAR
Wiegght<-switch(SCrit,
  Mean   = mean(Vec,na.rm = TRUE),
  Sum     = sum(Vec,na.rm = TRUE),
  Median =median(Vec,na.rm = TRUE),
  WMedain=median(Vec,na.rm = TRUE)*sum(is.na(Vec)==FALSE),
  Active=sum(is.finite(Vec)),
  Red=Sum((Vec >= PlottingCat.EAR[3]),na.rm = TRUE),
  Color=1000000*sum((Vec >= PlottingCat.EAR[3]),na.rm = TRUE)+10000*sum((Vec >=
  PlottingCat.EAR[2]),na.rm = TRUE)+100*sum((Vec >= PlottingCat.EAR[1]),na.rm = TRUE)+sum((Vec
  >= 0),na.rm = TRUE)
)
#Color Changed 12-24-205 JS

return(Wiegght)

```



}

```
#####
#####
```

```
ApplyCharLimit<-function(String,Limit,IsChemical){
#Apply a Character limit, removes right white space, pads left white space
#IsChemical is a bool for chemical names
#Uses Global ChemInfoList.EAR

#Filter right white space
Split<-strsplit(String,split=' ')[[1]]
WhiteNum<-which(Split==' ')
CharNum<-which(Split!=' ')
Remove<-WhiteNum[which(WhiteNum > max(CharNum))]
if (length(Remove)>0){
  Split<-Split[-Remove]
}

#Truncate String larger then the limit
if (length(Split) > Limit){
  NewString<-paste(Split[1:Limit],collapse="")

  #Replace Chemical name with formula is a chemical is above the limit
  if (IsChemical==TRUE){
    ChemName<-paste(Split,collapse="")
    ChemName<-as.character(ChemInfoList.EAR$Formula[which(ChemInfoList.EAR$Names==
    ChemName)])
    if (length(ChemName)>0){
      Split<-strsplit(ChemName,split=' ')[[1]]
    }
  }
}

#Left pad white to ensure a constant limit
if (length(Split) < Limit){
  WhiteSpace<-paste(rep(' ',Limit-length(Split)),collapse="")
  NewString<-paste(Split,collapse="")
  NewString<-paste(WhiteSpace,NewString,sep=' ')
}

#If at limit do nothing
if(length(Split) == Limit){
  NewString<-paste(Split,collapse="")
}

return(NewString)
}
```

```
#####
#####
```

```
UnderToWhite<-function(Str){
#Changes underscores in a string to while space
SpStr<-strsplit(Str,')[[1]]
Under<-which(SpStr=='_')
if (length(Under)>0){
  SpStr[Under]<-' '
}
```

```

}
  Str<-paste(SpStr,collapse = "")
return(Str)
}
#####
#####

getLocation<-function(EARCube, ValueMin, ValueMax, UseNA) {
#Attains the locations within EAR Cube that are between
  NRows<-dim(EARCube) [1]
  if (UseNA==TRUE) {
    Locs<-which(is.na(EARCube)==TRUE)
  }else{
    Locs<-which(EARCube >= ValueMin & EARCube < ValueMax)
  }
  X<-Locs %% NRows
  if (length(X[X==0])>0) {
    X[X==0]<-NRows
  }
  Y<-ceiling(Locs/NRows)

  Points<-cbind(X,Y)
return(Points)
}
#####
#####

Which.Apply<-function(Value,Vec) {
#Which to be called though an apply function
  N<-which(Vec==Value)
  if (length(N)>0) {
    return(N)
  }
#Return Null is nothing is found
return(NULL)
}
#####
#####

```
